# Supplementary material for: The Puzzle of Metabolite Exchange and Identification of Putative Octotrico Peptide Repeat Expression Regulators in the Nascent Photosynthetic Organelles of Paulinella chromatophora
Source: Front Microbiol. 2020 Nov 27;11:607182. doi: 10.3389/fmicb.2020.607182 (PMC7729196; doi:10.3389/fmicb.2020.607182)
Supplement: Supplementary file 3 [file Table_2.XLSX]

## Sheet: chromatophore (CE)
Table S2: The table lists transporters and transport systems for ions and metabolites that could be identified in the chromatophore genome.
The list contains 35 proteins comprising the 25 transporters or transport systems depicted in Figure 2D. Proteins involved in membrane transport were predicted in the chromatophore genome (GenBank accession CP000815.1) with TransAAP (Elbourne et al. 2017), classified according to the Transporter Classification Database (TCDB, Saier et al. 2016), and curated manually. The TCDB-Number, abbreviated …
ID	ID	TCDB #	Transporter Family	Transporter Family	Most similar	Subunit	Transporter/Transport system	Putative localization	Putative substrate	Substrate group (Fig.1)	Mean norm. Intensity in CM	Intensity level (Fig. 2D)	Literature
PCH_231734_232777	PCC0210	1.A.112 or 1.C.126	CNNM/HlyC	The Cyclin M Mg2+ Exporter (CNNM) Family or The HlyC (HlyC) Family of Haemolysins	....		CNNM-family putative magnesium export channel	IM	magnesium?	ion/metal	3.06168e-05	2.48596	Gimenez-Mascarell et al. 2019
PCH_575469_576767	PCC0504	1.A.112 or 1.C.126	CNNM/HlyC	The Cyclin M Mg2+ Exporter (CNNM) Family or The HlyC (HlyC) Family of Haemolysins	....		CNNM-family putative magnesium export channel	IM	magnesium?	ion/metal	3.12164e-05	2.49438	Gimenez-Mascarell et al. 2019
PCH_896670_897809	PCC0817	1.A.23	MscS	The Small Conductance Mechanosensitive Ion Channel (MscS) Family	MscS		ion channel MscS	IM	ions	ion/metal	1.72975e-05	2.23798	Rasmussen 2016
PCH_516580_517980	PCC0450	1.A.26	MgtE	The Mg2+ Transporter-E (MgtE) Family	MgtE		magnesium importer MgtE	IM	magnesium	ion/metal	5.19407e-06	1.71551	Pohland and Schneider 2019
PCH_1968_2867	PCC0003	2.A.19	CaCA	The Ca2+:Cation Antiporter (CaCA) Family	CAX		CaCa-family calcium:sodium antiporter	IM	Ca+/Na+/K+ : H+/Cations	ion/metal			Waditee et al. 2004
PCH_542678_544015	PCC0474	2.A.37	CPA2	The Monovalent Cation:Proton Antiporter-2 (CPA2) Family	NhaS3		sodium:proton antiporter NhaS3	TM	sodium	ion/metal	0.000117431	3.06978	Tsunekawa et al. 2009
PCH_782801_783982	PCC0715	2.A.38	Trk	The K+ Transporter (Trk) Family	KtrE	peripheral membrane protein	KtrABE potassium transporter	IM	potassium	ion/metal			Zulkifli et al. 2010, Matsuda et al. 2004
PCH_731111_731815	PCC0666	2.A.38	Trk	The K+ Transporter (Trk) Family	KtrA	NAD-binding peripheral membrane protein		IM	potassium	ion/metal	4.14827e-05	2.61787	Zulkifli et al. 2010, Matsuda et al. 2004
PCH_729749_731098	PCC0665	2.A.38	Trk	The K+ Transporter (Trk) Family	KtrB	permease component		IM	potassium	ion/metal			Matsuda et al. 2004
PCH_11900_13024	PCC0013	2.A.4	CDF	The Cation Diffusion Facilitator (CDF) Family	....		CDF-family divalent cation:proton antiporter	IM	Cd2+, Zn2+, Co2+ (Cu2+, Ni2+) : H+	ion/metal			Kolaj-Robin et al. 2015
PCH_727425_729257	PCC0664	2.A.47	DASS	The Divalent Anion:Na+ Symporter (DASS) Family	....		DASS-family sodium:dicarboxylate/sulfate symporter	IM	oxyanions or carboxylates	unknown	4.36706e-05	2.64019	Pootakham et al. 2010, Gisin et al. 2010, Rhie et al. 2014, Mancusso et al. 2012, Weber and Flügge 2002
PCH_3042_4685	PCC0004	2.A.53	SulP	The Sulfate Permease (SulP) Family	BicA		bicarbonate:sodium symporter BicA	IM	bicarbonate	inorganic anion	0.000881586	3.94526	Price et al. 2004
PCH_585949_587562	PCC0513	2.A.66	MOP	The Multidrug/Oligosaccharidyl-lipid/Polysaccharide (MOP) Flippase Superfamily	MurJ	MVF	lipid II flippase MurJ	IM	peptidoglycan-lipid II	lipid/cell wall components			Kumar et al. 2019
PCH_800612_801532	PCC0734	2.A.7	DMT	The Drug/Metabolite Transporter (DMT) Superfamily: The 10 TMS Drug/Metabolite Exporter (DME) Family	....		DME-family drug/metabolite transporter	unclear	amino acids/metabolites?	unknown	9.08284e-06	1.95822	Zakataeva et al. 2006, Rouanet and Nasser 2001, Jack et al. 2001
PCH_279720_280262	PCC0253	2.A.88	VUT	Vitamin Uptake Transporter/ Energy-coupling factor (VUT or ECF) Family	BioY		biotin uptake transporter BioY	unclear	biotin	other			Finkenwirth et al. 2013, Review: Eitinger et al. 2011
PCH_734779_736809	PCC0669	3.A.1	ABC1	The ATP-binding Cassette (ABC) Superfamily: Peroxysomal Fatty Acyl CoA Transporter (P-FAT) Family (ABCD)	....	ABC+membrane	ABC-transporter for fatty acyl CoA or antimicrobial peptides	IM	fatty acyl CoA, long chain fatty acids or antimicrobial peptides	unknown	0.0050101	4.69985	Linka and Esser 2012, Guefrachi et al. 2015
PCH_332331_333008	PCC0300	3.A.1	ABC2	The ATP-binding Cassette (ABC) Superfamily: The Biotin Uptake Transporter (BioMNY) Family or Putative Thiamine Uptake Transporter (ThiW) Family	....	EcfA	ECF-type putative vitamin or heavy metal importer	IM	cobalt or vitamins?	unknown	1.7046e-05	2.23162	Review: Eitinger et al. 2011, Rodionov et al. 2009
PCH_51148_52089	PCC0049	3.A.1	ABC2	The ATP-binding Cassette (ABC) Superfamily: The Biotin Uptake Transporter (BioMNY) Family or Putative Thiamine Uptake Transporter (ThiW) Family	....	EcfT		IM	cobalt or vitamins?	unknown			Review: Eitinger et al. 2011, Rodionov et al. 2009
PCH_916559_917206	PCC0834	3.A.1	ABC2	The ATP-binding Cassette (ABC) Superfamily: The Biotin Uptake Transporter (BioMNY) Family or Putative Thiamine Uptake Transporter (ThiW) Family	....	EcfA		IM	cobalt or vitamins?	unknown			Review: Eitinger et al. 2011, Rodionov et al. 2009
PCH_771552_772301	PCC0705	3.A.1	ABC2	The ATP-binding Cassette (ABC) Superfamily: The Biotin Uptake Transporter (BioMNY) Family or Putative Thiamine Uptake Transporter (ThiW) Family	....	EcfS		IM	cobalt or vitamins?	unknown			Review: Eitinger et al. 2011, Rodionov et al. 2009
PCH_183349_184338	PCC0161	3.A.1	ABC2	The ATP-binding Cassette (ABC) Superfamily: The Phosphate Uptake Transporter (PhoT) Family	PstC	membrane	phosphate ABC-transporter PstABCS	IM	phosphate	inorganic anion			Reyes-Prieto et al. 2010, Valadez-Cano et al. 2017
PCH_184335_185261	PCC0162	3.A.1	ABC2	The ATP-binding Cassette (ABC) Superfamily: The Phosphate Uptake Transporter (PhoT) Family	PstA	membrane		IM	phosphate	inorganic anion			Reyes-Prieto et al. 2010, Valadez-Cano et al. 2017
PCH_185266_186120	PCC0163	3.A.1	ABC2	The ATP-binding Cassette (ABC) Superfamily: The Phosphate Uptake Transporter (PhoT) Family	PstB	ABC		IM	phosphate	inorganic anion	6.75591e-06	1.82968	Reyes-Prieto et al. 2010, Valadez-Cano et al. 2017
PCH_448498_449547	PCC0395	3.A.1	ABC2	The ATP-binding Cassette (ABC) Superfamily: The Phosphate Uptake Transporter (PhoT) Family	PstS	substrate binding		IM	phosphate	inorganic anion			Reyes-Prieto et al. 2010, Valadez-Cano et al. 2017
PCH_1018971_1020773	PCC0921	3.A.1	ABC1	The ATP-binding Cassette (ABC) Superfamily: (Lipid Exporter (LipidE) Family or Drug Exporter-4 (DrugE4) Family)	....	ABC+membrane	putative heterodimeric multidrug efflux ABC-transporter	IM	glycolate?, glycolipid?, Multidrug?	multidrug	0.000105722	3.02417	Braakman et al. 2017
PCH_248354_250108	PCC0227	3.A.1	ABC1	The ATP-binding Cassette (ABC) Superfamily: (Lipid Exporter (LipidE) Family or Drug Exporter-4 (DrugE4) Family)	....	ABC+membrane		IM	glycolate?, glycolipid?, Multidrug?	multidrug	5.20326e-05	2.71628	Braakman et al. 2017
PCH_819001_820008	PCC0749	3.A.1	ABC2	The ATP-binding Cassette (ABC) Superfamily: Drug Exporter-1 (DrugE1) Family	CmrA	ABC	multidrug efflux ABC-transporter CmrAB	TM	multidrug	multidrug	0.000140519	3.14773	Menendez et al. 2007
PCH_820063_820911	PCC0750	3.A.1	ABC2	The ATP-binding Cassette (ABC) Superfamily: Drug Exporter-1 (DrugE1) Family	CmrB	membrane		TM	multidrug	multidrug	3.3514e-05	2.52523	Menendez et al. 2007
PCH_334743_337151	PCC0303	3.A.3	P-ATPase	The P-type ATPase (P-ATPase) Superfamily	CtaA?		copper-translocating P-type ATPase CtaA	unclear	copper	ion/metal	2.87015e-05	2.4579	Seigneurin-Berny et al. 2006, Huertas et al. 2014, Raimunda et al. 2011
PCH_197593_197892	PCC0175	9.A.4	YggT	The YggT or Fanciful K+ Uptake-B (FkuB; YggT) Family	YggT		putative potassium uptake transporter YggT	IM	potassium?	ion/metal?			Ito et al. 2009, Nakamura et al. 1996, Hagl 2017
PCH_738443_738772	PCC0672	9.A.4	YggT	The YggT or Fanciful K+ Uptake-B (FkuB; YggT) Family	YggT		putative potassium uptake transporter YggT	IM	potassium?	ion/metal?			Ito et al. 2009, Nakamura et al. 1996, Hagl 2017
PCH_264280_266097	PCC0239	9.A.8	FeoB	The Ferrous Iron Uptake (FeoB) Family	FeoB		ferrous iron transporter FeoB	IM	ferrous iron	ion/metal	6.67262e-06	1.8243	Sestok et al. 2018
PCH_295295_296206	PCC0266	9.B.14.	HHP	The Heme Handling Protein (HHP) Family	CcsA		putative HHP-family heme transporter CcsA	TM	heme?	other	7.1157e-05	2.85222	Sutherland et al. 2018
PCH_600989_602299	PCC0529	9.B.67	OAP	O-antigen Polymerase (OAP) Family	IctB		IctB (involved in bicarbonate uptake)	IM	bicarbonate?	inorganic anion			Bonfil et al. 1998, Shibata et al. 2002
PCH_45611_46753	PCC0044	9.B.73	CemA	Chloroplast Envelope/Cyanobacterial Membrane Protein (CemA) Family	PxcA		proton extrusion protein PxcA	IM	protons?	ion/metal	6.24651e-06	1.79564	Katoh et al. 1996a, Katoh et al. 1996b, Rolland et al. 1997, Sasaki et al. 1993

## Sheet: Synechococcus WH5701
Table S2: The table lists transporters and transport systems for ions and metabolites that could be identified in the scaffold-level genome assembly of the cyanobacterium Synechococcus sp. WH5701.
The list contains transporters or transport systems predicted in the genome of Synechococcus sp. WH5701 (GenBank assembly accession: GCA_000153045.1, AANO00000000.1) with TransAAP (Elbourne et al. 2017), classified according to the Transporter Classification Database (TCDB, Saier et al. 2016), and curated manually. The TCDB-Number, abbreviated and full family name, as well as common gene name are…
ID	TCDB #	Transporter Family	Transporter Family	Subfamily/Subunit	Gene	Transporter/Transport system	Putative substrate group (Fig.1)	Putative localization	BLAST on Synechocystis (e-05)	annotation	localization	reciprocal BLAST	annotation	localization	Literature
EAQ74844.1	1.B.23	CBP	The Cyanobacterial Porin (CBP) Family	beta-barrel pore	porin2, somA	bicarbonate-selective porin	inorganic anion	OM				SGL_RS10675	bicarbonate-selective porin
EAQ75324.1	1.B.23	CBP	The Cyanobacterial Porin (CBP) Family	beta-barrel pore	oprB2, somA	iron-selective porin	ion/metal	OM				SGL_RS04720	iron-selective porin
EAQ75323.1	1.B.23	CBP	The Cyanobacterial Porin (CBP) Family	beta-barrel pore	oprB6, somA	iron-selective porin	ion/metal	OM				SGL_RS07085	iron-selective porin
EAQ75982.1	1.B.18	OMA	The Outer Membrane Auxiliary (OMA) Protein Family	beta-barrel pore	oma/gumB	OM- sugar binding protein	sugar-(P)	OM				SGL_RS05210	OM- sugar binding protein
EAQ75471.1	1.B.42	LPS-EP	The Outer Membrane Lipopolysaccharide Export Porin (LPS-EP) Family	beta-barrel pore	ostA, lptD	Outer Membrane Lipopolysaccharide Export Porin	lipid/cell wall components	OM				SGL_RS12875	Outer Membrane Lipopolysaccharide Export Porin
EAQ75288.1	1.B.17	OMF	The Outer Membrane Factor (OMF) Family	beta-barrel pore	hgdD, tolC	porin for glycolipid secretion, works with ABC-transporter DevABC	lipid/cell wall components	OM				SGL_RS10665	porin for glycolipid secretion, works with ABC-transporter DevABC
EAQ76268.1	3.A.1	ABC	The ATP-binding Cassette (ABC) Superfamily	ABC+membrane	sll0182	ABC-transporter for fatty acyl CoA or antimicrobial peptides	unknown	PM	SGL_RS14635	ABC-transporter for fatty acyl CoA or antimicrobial peptides	PM	SGL_RS14635	ABC-transporter for fatty acyl CoA or antimicrobial peptides	PM
EAQ75378.1	2.A.86	AI-2E	The Autoinducer-2 Exporter (AI-2E) Family (Formerly the PerM Family, TC #9.B.22)			AI-2E-family transporter	unknown	PM	SGL_RS15570	AI-2E-family transporter		SGL_RS10785	AI-2E-family transporter	PM
EAQ74894.1	3.A.1	ABC	The ATP-binding Cassette (ABC) Superfamily	membrane	natG	amino acid uptake transporter NatFGH/BgtA	amino acid	PM							Pernil et al. 2008
EAQ74895.1	3.A.1	ABC	The ATP-binding Cassette (ABC) Superfamily	membrane	natH		amino acid	PM							Pernil et al. 2008
EAQ74893.1	3.A.1	ABC	The ATP-binding Cassette (ABC) Superfamily	substrate binding	natF		amino acid	PM							Pernil et al. 2008
EAQ75482.1	1.A.11	Amt	The Ammonia Transporter Channel (Amt) Family		amt1, amt	ammonium channel amt1	inorganic anion	PM	SGL_RS15695	ammonium channel amt1	PM	SGL_RS03810	ammonium channel amt2	PM
EAQ74447.1	1.A.8	MIP	The Major Intrinsic Protein (MIP) Family		aqpZ	aquaporin	other	PM	SGL_RS08525	aquaporin	PM	SGL_RS08525	aquaporin	PM
EAQ74905.1	2.A.45	ArsB	The Arsenite-Antimonite (ArsB) Efflux Family		arsB	arsenical efflux pump arsB	unknown	PM	SGL_RS17685	arsenical efflux pump arsAB	PM	SGL_RS17685	arsenical efflux pump arsAB	PM
EAQ75564.1	3.A.1	ABC	The ATP-binding Cassette (ABC) Superfamily	ABC	cmpD	bicarbonate ABC-transporter cmpABCD (BCT1)	inorganic anion	PM	SGL_RS16585	bicarbonate ABC-transporter cmpABCD (BCT1)	PM	SGL_RS16585	bicarbonate ABC-transporter cmpABCD (BCT1)	PM
EAQ75565.1	3.A.1	ABC	The ATP-binding Cassette (ABC) Superfamily	ABC	cmpC		inorganic anion	PM	SGL_RS16580	bicarbonate ABC-transporter cmpABCD (BCT1)	PM	SGL_RS16580	bicarbonate ABC-transporter cmpABCD (BCT1)	PM
EAQ75566.1	3.A.1	ABC	The ATP-binding Cassette (ABC) Superfamily	membrane	cmpB		inorganic anion	PM	SGL_RS16570	bicarbonate ABC-transporter cmpABCD (BCT1)	PM	SGL_RS16570	bicarbonate ABC-transporter cmpABCD (BCT1)	PM
EAQ75567.1	3.A.1	ABC	The ATP-binding Cassette (ABC) Superfamily	substrate binding	cmpA		inorganic anion	PM
EAQ74840.1	2.A.53	SulP	The Sulfate Permease (SulP) Family		bicA, sll0834	bicarbonate transporter BicA	inorganic anion	PM	SGL_RS15100	bicarbonate transporter BicA	PM	SGL_RS15100	bicarbonate transporter BicA	PM
EAQ74906.1	3.A.3	P-ATPase	The P-type ATPase (P-ATPase) Superfamily		pma1	cation transporting P-type ATPase	ion/metal	PM	SGL_RS08700	cation transporting P-type ATPase	PM	SGL_RS08700	cation transporting P-type ATPase	PM
EAQ75129.1	3.A.3	P-ATPase	The P-type ATPase (P-ATPase) Superfamily		pacL, ziaA	cation transporting P-type ATPase	ion/metal	PM	SGL_RS16270	cation transporting P-type ATPase	PM	SGL_RS05605	cation transporting P-type ATPase	PM
EAQ75926.1	3.A.3	P-ATPase	The P-type ATPase (P-ATPase) Superfamily		pacL	cation transporting P-type ATPase	ion/metal	PM	SGL_RS16270	cation transporting P-type ATPase	PM
EAQ76415.1	3.A.3	P-ATPase	The P-type ATPase (P-ATPase) Superfamily		pacL	cation transporting P-type ATPase	ion/metal	PM	SGL_RS16270	cation transporting P-type ATPase	PM
EAQ75354.1	2.A.63	CPA3	The Monovalent Cation (K+ or Na+):Proton Antiporter-3 (CPA3) Family	MnhA	ndhF1, ndhF, mrpA	cation:proton antiporter mrpABCDEFG	ion/metal	PM	SGL_RS15190	cation:proton antiporter mrpABCDEFG	PM	SGL_RS15190	cation:proton antiporter mrpABCDEFG	PM
EAQ76816.1	2.A.63	CPA3	The Monovalent Cation (K+ or Na+):Proton Antiporter-3 (CPA3) Family	MnhC	mrp		ion/metal	PM	SGL_RS05360	cation:proton antiporter mrpABCDEFG	PM	SGL_RS05350	cation:proton antiporter mrpABCDEFG	PM
EAQ76815.1	2.A.63	CPA3	The Monovalent Cation (K+ or Na+):Proton Antiporter-3 (CPA3) Family	MnhD	ndhD5, ndhD, mrpD		ion/metal	PM	SGL_RS05355	cation:proton antiporter mrpABCDEFG	PM	SGL_RS05355	cation:proton antiporter mrpABCDEFG	PM
EAQ76810.1	2.A.63	CPA3	The Monovalent Cation (K+ or Na+):Proton Antiporter-3 (CPA3) Family		mrp		ion/metal	PM	SGL_RS05390	cation:proton antiporter mrpABCDEFG	PM	SGL_RS05390	cation:proton antiporter mrpABCDEFG	PM
EAQ76811.1	2.A.63	CPA3	The Monovalent Cation (K+ or Na+):Proton Antiporter-3 (CPA3) Family		mrpA, slr201		ion/metal	PM	SGL_RS05385	cation:proton antiporter mrpABCDEFG	PM	SGL_RS05385	cation:proton antiporter mrpABCDEFG	PM
EAQ76812.1	2.A.63	CPA3	The Monovalent Cation (K+ or Na+):Proton Antiporter-3 (CPA3) Family		mrp		ion/metal	PM	SGL_RS05380	cation:proton antiporter mrpABCDEFG	PM	SGL_RS05380	cation:proton antiporter mrpABCDEFG	PM
EAQ76813.1	2.A.63	CPA3	The Monovalent Cation (K+ or Na+):Proton Antiporter-3 (CPA3) Family		mrp		ion/metal	PM	SGL_RS05375	cation:proton antiporter mrpABCDEFG	PM	SGL_RS05375	cation:proton antiporter mrpABCDEFG	PM
EAQ76814.1	2.A.63	CPA3	The Monovalent Cation (K+ or Na+):Proton Antiporter-3 (CPA3) Family		mrp		ion/metal	PM				SGL_RS05370	cation:proton antiporter mrpABCDEFG	PM
EAQ74381.1	2.A.4	CDF	The Cation Diffusion Facilitator (CDF) Family		sll1263	CDF-family cation efflux system	ion/metal	PM	SGL_RS09985	CDF-family cation efflux system	PM	SGL_RS09985	CDF-family cation efflux system	PM
EAQ76634.1	2.A.49	ClC	The Chloride Carrier/Channel (ClC) Family			ClC-family chloride channel	ion/metal	PM	SGL_RS12280	ClC-family chloride channel	PM	SGL_RS12280	ClC-family chloride channel	PM
EAQ74950.1	2.A.49	ClC	The Chloride Carrier/Channel (ClC) Family		clcA	ClC-family chloride/proton antiporter	ion/metal	PM	SGL_RS08170	ClC-family chloride/proton antiporter	PM
EAQ75695.1	2.A.49	ClC	The Chloride Carrier/Channel (ClC) Family		clcA	ClC-family chloride/proton antiporter	ion/metal	PM	SGL_RS12280	ClC-family chloride channel	PM	SGL_RS08170	ClC-family chloride/proton antiporter	PM
EAQ75497.1	9.A.40	HCC	The HlyC/CorC (HCC) Family			CNNM-family magnesium export channel	ion/metal	PM	SGL_RS11910	CNNM-family magnesium export channel	PM	SGL_RS11910	CNNM-family magnesium export channel	PM
EAQ76163.1	9.A.40	HCC	The HlyC/CorC (HCC) Family			CNNM-family magnesium export channel	ion/metal	PM	SGL_RS10060	CNNM-family magnesium export channel	PM	SGL_RS10060	CNNM-family magnesium export channel	PM
EAQ73636.1	3.A.3	P-ATPase	The P-type ATPase (P-ATPase) Superfamily		pacS	copper transporting P-type ATPase	ion/metal	PM	SGL_RS05435	copper transporting P-type ATPase	PM
EAQ75668.1	3.A.3	P-ATPase	The P-type ATPase (P-ATPase) Superfamily		pacS	copper transporting P-type ATPase	ion/metal	PM	SGL_RS05435	copper transporting P-type ATPase	PM	SGL_RS05435	copper transporting P-type ATPase	PM
EAQ74096.1	2.A.47	DASS	The Divalent Anion:Na+ Symporter (DASS) Family			DASS-family sodium:dicarboxylate/sulfate symporter	unknown	PM	SGL_RS03935	DASS-family sodium:dicarboxylate/sulfate symporter	PM
EAQ76325.1	2.A.47	DASS	The Divalent Anion:Na+ Symporter (DASS) Family		sac1	DASS-family sodium:dicarboxylate/sulfate symporter	unknown	PM	SGL_RS03935	DASS-family sodium:dicarboxylate/sulfate symporter	PM	SGL_RS03935	DASS-family sodium:dicarboxylate/sulfate symporter	PM
EAQ74295.1	3.A.1	ABC	The ATP-binding Cassette (ABC) Superfamily	membrane	dppC	dipeptide ABC-transporter dppABCDF	other	PM	SGL_RS12560	oligopeptide ABC-transporter appABCDF	PM	SGL_RS12560	oligopeptide ABC-transporter appABCDF	PM
EAQ74999.1	3.A.1	ABC	The ATP-binding Cassette (ABC) Superfamily	membrane	dppB		other	PM	SGL_RS07570	oligopeptide ABC-transporter appABCDF	PM	SGL_RS07570	oligopeptide ABC-transporter appABCDF	PM
EAQ75000.1	3.A.1	ABC	The ATP-binding Cassette (ABC) Superfamily	substrate binding	dppA		other	PM	SGL_RS08095	oligopeptide ABC-transporter appABCDF	PM	SGL_RS07890	oligosaccharide ABC-transporter appABCDF	PM
EAQ75159.1	3.A.1	ABC	The ATP-binding Cassette (ABC) Superfamily	EcfA	cbiO	ECF-type vitamin or heavy metal importer	unknown	PM	SGL_RS14425	cobalt ECF-transporter cbiMNOQ	PM
EAQ75057.1	3.A.1	ABC	The ATP-binding Cassette (ABC) Superfamily	EcfA2			unknown	PM	SGL_RS13290	ECF-type vitamin or heavy metal importer	PM	SGL_RS13290	ECF-type vitamin or heavy metal importer	PM
EAQ75330.1	3.A.1	ABC	The ATP-binding Cassette (ABC) Superfamily	EcfA2	ndhM		unknown	PM	SGL_RS08060	ECF-type vitamin or heavy metal importer	PM	SGL_RS08060	ECF-type vitamin or heavy metal importer	PM
EAQ74208.1	3.A.2	ABC	The ATP-binding Cassette (ABC) Superfamily	EcfT			unknown	PM				SGL_RS10365	ECF-type vitamin or heavy metal importer	PM
EAQ76120.1	2.A.88	ECF	The Vitamin Uptake Transporter (VUT or ECF) Family	EcfS			unknown	PM
EAQ73665.1	3.A.1	ABC	The ATP-binding Cassette (ABC) Superfamily	EcfT			unknown	PM	SGL_RS10365	ECF-type vitamin or heavy metal importer	PM
EAQ74873.1	9.A.8	FeoB	The Ferrous Iron Uptake (FeoB) Family		feoB	ferrous iron transporter feoB	ion/metal	PM	SGL_RS05125	ferrous iron transporter feoB	PM	SGL_RS05125	ferrous iron transporter feoB	PM
EAQ74055.1	3.A.1	ABC	The ATP-binding Cassette (ABC) Superfamily	substrate binding	gltI	glutamate binding protein	amino acid	PM	SGL_RS02570	glutamate binding protein	PM	SGL_RS02570	glutamate binding protein	PM
EAQ75126.1	1.A.10	GIC	The Glutamate-gated Ion Channel (GIC) Family of Neurotransmitter Receptors		gluR	glutamate-gated ion channel	ion/metal	PM	SGL_RS08465	glutamate-gated ion channel	PM	SGL_RS08465	glutamate-gated ion channel	PM
EAQ76482.1	1.A.10	GIC	The Glutamate-gated Ion Channel (GIC) Family of Neurotransmitter Receptors		gluR	glutamate-gated ion channel	ion/metal	PM	SGL_RS08465	glutamate-gated ion channel	PM
EAQ74642.1	3.A.1	ABC	The ATP-binding Cassette (ABC) Superfamily	ABC	devA	glycolipid exporter devABC + OM-pore	lipid/cell wall components	PM	SGL_RS15420	glycolipid exporter devABC + OM-pore hgdD	PM	SGL_RS15420	glycolipid exporter devABC + OM-pore hgdD	PM
EAQ74641.1	3.A.1	ABC	The ATP-binding Cassette (ABC) Superfamily	membrane	devC		lipid/cell wall components	PM	SGL_RS17550	glycolipid exporter devABC + OM-pore hgdD	PM	SGL_RS17550	glycolipid exporter devABC + OM-pore hgdD	PM
EAQ74640.1	3.A.1	ABC	The ATP-binding Cassette (ABC) Superfamily	membrane fusion protein	devB		lipid/cell wall components	PM	SGL_RS17555	glycolipid exporter devABC + OM-pore hgdD	PM	SGL_RS17555	glycolipid exporter devABC + OM-pore hgdD	PM
EAQ74217.1	2.A.2	GPH	The Glycoside-Pentoside-Hexuronide (GPH):Cation Symporter Family		melB	GPH-family multidrug transporter	multidrug	PM	SGL_RS10585	GPH-family multidrug transporter	PM
EAQ75893.1	2.A.2	GPH	The Glycoside-Pentoside-Hexuronide (GPH):Cation Symporter Family		melB	GPH-family multidrug transporter	multidrug	PM	SGL_RS10585	GPH-family multidrug transporter	PM	SGL_RS10585	GPH-family multidrug transporter	PM
EAQ74773.1	3.A.3	P-ATPase	The P-type ATPase (P-ATPase) Superfamily		kdpB, coaT, corT, cadA, slr0797	heavy metal-translocating P-type ATPase	ion/metal	PM	SGL_RS16085	cobalt efflux P-type ATPase corT	PM	SGL_RS08870	potassium P-type ATPase kdpABCD	PM
EAQ73598.1	3.A.1	ABC	The ATP-binding Cassette (ABC) Superfamily	ABC+membrane		heterodimeric multidrug efflux ABC-transporter	multidrug	PM	SGL_RS15595	heterodimeric multidrug efflux ABC-transporter 2	PM
EAQ75110.1	3.A.1	ABC	The ATP-binding Cassette (ABC) Superfamily	ABC+membrane			multidrug	PM	SGL_RS15595	heterodimeric multidrug efflux ABC-transporter 2	PM	SGL_RS15595	heterodimeric multidrug efflux ABC-transporter 2	PM
EAQ75190.1	3.A.1	ABC	The ATP-binding Cassette (ABC) Superfamily	ABC+membrane		homodimeric lipid A ABC-exporter	lipid/cell wall components	PM	SGL_RS05425	homodimeric lipid A ABC-exporter	PM	SGL_RS05425	homodimeric lipid A ABC-exporter	PM
EAQ75449.1	9.B.67	OAP	O-antigen Polymerase (OAP) Family		ictB	ictB (involved in bicarbonate uptake)	inorganic anion	PM	SGL_RS09360	ictB (involved in bicarbonate uptake)	PM	SGL_RS09360	ictB (involved in bicarbonate uptake)	PM
EAQ75613.1	1.A.22	MscL	The Large Conductance Mechanosensitive Ion Channel (MscL) Family		mscL	ion channel MscL	ion/metal	PM	SGL_RS07135	ion channel MscL	PM	SGL_RS07135	ion channel MscL	PM
EAQ73790.1	1.A.23	MscS	The Small Conductance Mechanosensitive Ion Channel (MscS) Family		kef, kchX	ion channel mscS	ion/metal	PM	SGL_RS17505	potassium channel mscS	PM
EAQ74764.1	1.A.23	MscS	The Small Conductance Mechanosensitive Ion Channel (MscS) Family			ion channel mscS	ion/metal	PM	SGL_RS15765	ion channel mscS	PM	SGL_RS15765	ion channel mscS	PM
EAQ74767.1	1.A.23	MscS	The Small Conductance Mechanosensitive Ion Channel (MscS) Family			ion channel mscS	ion/metal	PM	SGL_RS14295	ion channel mscS	PM	SGL_RS02750	mscS-type channel	PM
EAQ75636.1	1.A.23	MscS	The Small Conductance Mechanosensitive Ion Channel (MscS) Family			ion channel mscS	ion/metal	PM	SGL_RS15465	ion channel mscS	PM
EAQ76046.1	1.A.23	MscS	The Small Conductance Mechanosensitive Ion Channel (MscS) Family			ion channel mscS	ion/metal	PM	SGL_RS14295	ion channel mscS	PM
EAQ76518.1	1.A.23	MscS	The Small Conductance Mechanosensitive Ion Channel (MscS) Family		pamA	ion channel mscS	ion/metal	PM	SGL_RS15465	ion channel mscS	PM	SGL_RS04955	mscS-type channel for osmolytes	PM
EAQ76578.1	1.A.23	MscS	The Small Conductance Mechanosensitive Ion Channel (MscS) Family		kef, kchX	ion channel mscS	ion/metal	PM	SGL_RS17505	potassium channel mscS	PM
EAQ74781.1	3.A.1	ABC	The ATP-binding Cassette (ABC) Superfamily	ABC		ion/metabolite ABC-exporter	unknown	PM
EAQ74782.1	3.A.1	ABC	The ATP-binding Cassette (ABC) Superfamily	membrane			unknown	PM	SGL_RS11655	ABC-transporter permease-component		SGL_RS11655	ABC-transporter permease-component
EAQ76358.1	1.A.2	IRK-C	The Inward Rectifier K+ Channel (IRK-C) Family			IRK-C type potassium channel	ion/metal	PM	SGL_RS00355	IRK-C type potassium channel	PM	SGL_RS00355	IRK-C type potassium channel	PM
EAQ74748.1	3.A.1	ABC	The ATP-binding Cassette (ABC) Superfamily	ABC	futC	iron ABC-transporter futA1A2BC	ion/metal	PM	SGL_RS10355	iron ABC-transporter futA1A2BC	PM	SGL_RS10355	iron ABC-transporter futA1A2BC	PM
EAQ74961.1	3.A.1	ABC	The ATP-binding Cassette (ABC) Superfamily	membrane	futB		ion/metal	PM	SGL_RS12585	iron ABC-transporter futA1A2BC	PM	SGL_RS09040	iron ABC-transporter sfuABC	PM
EAQ74960.1	3.A.1	ABC	The ATP-binding Cassette (ABC) Superfamily	substrate binding	futA1, sufA, sufA1, idiA, futA		ion/metal	PM	SGL_RS03245	iron ABC-transporter futA1A2BC	PM	SGL_RS03245	iron ABC-transporter futA1A2BC	PM
EAQ73557.1	3.A.1	ABC	The ATP-binding Cassette (ABC) Superfamily	membrane	futB-like, hitB	iron ABC-transporter, membrane component, partial	ion/metal	PM	SGL_RS12585	iron ABC-transporter futA1A2BC	PM
EAQ73628.1	3.A.1	ABC	The ATP-binding Cassette (ABC) Superfamily	membrane	futB-like, hitB	iron ABC-transporter, membrane component, partial	ion/metal	PM	SGL_RS12585	iron ABC-transporter futA1A2BC	PM
EAQ74892.1	2.A.38	Trk	The K+ Transporter (Trk) Family		ktrB, ntpJ	KtrABE potassium transporter	ion/metal	PM	SGL_RS09315	KtrABE potassium transporter	PM	SGL_RS09315	KtrABE potassium transporter	PM
EAQ76093.1	2.A.38	Trk	The K+ Transporter (Trk) Family		KtrE, dgdA		ion/metal	PM	SGL_RS09310	KtrABE potassium transporter	PM	SGL_RS09310	KtrABE potassium transporter	PM
EAQ76327.1	2.A.38	Trk	The K+ Transporter (Trk) Family		ktrA		ion/metal	PM				SGL_RS16795	KtrABE potassium transporter	PM
EAQ75962.1	3.A.1	ABC	The ATP-binding Cassette (ABC) Superfamily	ABC+membrane		lipid A ABC-exporter msbA	lipid/cell wall components	PM
EAQ76398.1	3.A.1	ABC	The ATP-binding Cassette (ABC) Superfamily	ABC	tgd3, sltC2	lipid ABC-transporter tgd123	lipid/cell wall components	PM	SGL_RS04315	lipid ABC-transporter tgd123 (1)	PM	SGL_RS02745	lipid ABC-transporter tgd123 (2)	PM
EAQ74216.1	3.A.1	ABC	The ATP-binding Cassette (ABC) Superfamily	membrane	tgd1		lipid/cell wall components	PM	SGL_RS04215	lipid ABC-transporter tgd123 (1)	PM	SGL_RS04215	lipid ABC-transporter tgd123 (1)	PM
EAQ76399.1	3.A.1	ABC	The ATP-binding Cassette (ABC) Superfamily	substrate binding	tgd2, ycf22, sltB1		lipid/cell wall components	PM	SGL_RS04310	lipid ABC-transporter tgd123 (2)	PM	SGL_RS04310	lipid ABC-transporter tgd123 (2)	PM
EAQ75480.1	2.A.66	MOP	The Multidrug/Oligosaccharidyl-lipid/Polysaccharide (MOP) Flippase Superfamily	MVF	murJ	lipid II flippase MurJ	lipid/cell wall components	PM	SGL_RS14090	lipid II flippase MurJ	PM	SGL_RS14090	lipid II flippase MurJ	PM
EAQ74658.1	3.A.1	ABC	The ATP-binding Cassette (ABC) Superfamily	ABC	lptB, ycf85	lipopolysaccharide ABC-transporter ABC-component	lipid/cell wall components	PM	SGL_RS02590	lipopolysaccharide ABC-transporter lptABF+OM pore lptD, ABC-component	PM	SGL_RS02590	lipopolysaccharide ABC-transporter lptABF+OM pore lptD, ABC-component	PM
EAQ75801.1	3.A.1	ABC	The ATP-binding Cassette (ABC) Superfamily	ABC	rfbB, slr0982	lipopolysaccharide ABC-transporter rfbAB	lipid/cell wall components	PM	SGL_RS03540	lipopolysaccharide ABC-exporter 2	PM	SGL_RS03540	lipopolysaccharide ABC-exporter 2	PM
EAQ75802.1	3.A.1	ABC	The ATP-binding Cassette (ABC) Superfamily	membrane	rfbA		lipid/cell wall components	PM				SGL_RS03520	lipopolysaccharide ABC-exporter 2	PM
EAQ76413.1	1.A.35	MIT	The CorA Metal Ion Transporter (MIT) Family		corA, rfrO	magnesium transporter CorA	ion/metal	PM	SGL_RS16695	magnesium transporter CorA	PM
EAQ75847.1	9.A.19	MgtE	The Mg2+ Transporter-E (MgtE) Family		mgtE	magnesium transporter mgtE	ion/metal	PM	SGL_RS06105	magnesium transporter mgtE	PM	SGL_RS06105	magnesium transporter mgtE	PM
EAQ76354.1	3.A.1	ABC	The ATP-binding Cassette (ABC) Superfamily	ABC	malK	maltose/trehalose ABC-transporter malEFGK	sugar-(P)	PM	SGL_RS17635	glucosylglycerol/osmolyte ABC-transporter ggtABCD	PM	SGL_RS09035	iron ABC-transporter sfuABC	PM	Nieves-Morión and Flores 2017
EAQ73505.1	3.A.1	ABC	The ATP-binding Cassette (ABC) Superfamily	membrane	malF-like		sugar-(P)	PM	SGL_RS06020	sugar ABC-transporter	PM				Nieves-Morión and Flores 2017
EAQ76352.1	3.A.1	ABC	The ATP-binding Cassette (ABC) Superfamily	membrane	malF		sugar-(P)	PM	SGL_RS06020	sugar ABC-transporter	PM				Nieves-Morión and Flores 2017
EAQ76353.1	3.A.1	ABC	The ATP-binding Cassette (ABC) Superfamily	membrane	malG		sugar-(P)	PM	SGL_RS08790	sugar ABC-transporter	PM				Nieves-Morión and Flores 2017
EAQ76351.1	3.A.1	ABC	The ATP-binding Cassette (ABC) Superfamily	substrate binding	malE		sugar-(P)	PM							Nieves-Morión and Flores 2017
EAQ74165.1	3.A.1	ABC	The ATP-binding Cassette (ABC) Superfamily	ABC	mntA	manganese ABC-transporter mntABC	ion/metal	PM	SGL_RS08815	manganese ABC-transporter mntABC	PM	SGL_RS01940	iron dicitrate ABC-transporter fecABCDE	PM
EAQ74848.1	3.A.1	ABC	The ATP-binding Cassette (ABC) Superfamily	ABC	mntA		ion/metal	PM	SGL_RS08815	manganese ABC-transporter mntABC	PM
EAQ74166.1	3.A.1	ABC	The ATP-binding Cassette (ABC) Superfamily	membrane	mntB		ion/metal	PM	SGL_RS08810	manganese ABC-transporter mntABC	PM	SGL_RS04630	zinc/cation ABC-transporter	PM
EAQ74850.1	3.A.1	ABC	The ATP-binding Cassette (ABC) Superfamily	membrane	mntB		ion/metal	PM	SGL_RS08810	manganese ABC-transporter mntABC	PM
EAQ74164.1	3.A.1	ABC	The ATP-binding Cassette (ABC) Superfamily	substrate binding	mntC		ion/metal	PM	SGL_RS08820	manganese ABC-transporter mntABC	PM	SGL_RS04620	zinc/cation ABC-transporter	PM
EAQ74847.1	3.A.1	ABC	The ATP-binding Cassette (ABC) Superfamily	substrate binding	mntC		ion/metal	PM	SGL_RS04620	zinc/cation ABC-transporter	PM
EAQ75542.1	3.A.1	ABC	The ATP-binding Cassette (ABC) Superfamily	ABC+membrane	modBC	molybdate ABC-transporter modABC	inorganic anion	PM	SGL_RS16430	molybdate ABC-transporter modABC	PM	SGL_RS16430	molybdate ABC-transporter modABC	PM
EAQ75543.1	3.A.1	ABC	The ATP-binding Cassette (ABC) Superfamily	substrate binding	modA		inorganic anion	PM	SGL_RS16435	molybdate ABC-transporter modABC	PM	SGL_RS16435	molybdate ABC-transporter modABC	PM
EAQ76519.1	1.A.23	MscS	The Small Conductance Mechanosensitive Ion Channel (MscS) Family			mscS-type channel	unknown	PM	SGL_RS15615	mscS-type channel	PM	SGL_RS15615	mscS-type channel	PM
EAQ75534.1	3.A.1	ABC	The ATP-binding Cassette (ABC) Superfamily	ABC+membrane		multidrug efflux ABC- transporter	multidrug	PM	SGL_RS07030	heterodimeric multidrug efflux ABC-transporter 1	PM
EAQ73979.1	3.A.1	ABC	The ATP-binding Cassette (ABC) Superfamily	ABC+membrane		multidrug efflux ABC-transporter	multidrug	PM	SGL_RS07030	heterodimeric multidrug efflux ABC-transporter 1	PM	SGL_RS06320	multidrug efflux ABC-transporter	PM
EAQ74491.1	3.A.1	ABC	The ATP-binding Cassette (ABC) Superfamily	ABC	macB partial?	multidrug efflux system macAB + OM pore	multidrug	PM	SGL_RS16750	ABC-transporter ABC-component		SGL_RS16750	ABC-transporter ABC-component
EAQ74577.1	3.A.1	ABC	The ATP-binding Cassette (ABC) Superfamily	membrane	macB		multidrug	PM	SGL_RS18285	multidrug efflux system macAB + OM pore	PM	SGL_RS18285	multidrug efflux system macAB + OM pore	PM
EAQ73970.1	3.A.1	ABC	The ATP-binding Cassette (ABC) Superfamily	ABC	natE	neutral amino acid ABC-transporter natABCDE	amino acid	PM	SGL_RS07665	neutral amino acid ABC-transporter natABCDE	PM	SGL_RS07665	neutral amino acid ABC-transporter natABCDE	PM
EAQ73971.1	3.A.1	ABC	The ATP-binding Cassette (ABC) Superfamily	ABC	natA		amino acid	PM	SGL_RS14000	neutral amino acid ABC-transporter natABCDE	PM	SGL_RS14000	neutral amino acid ABC-transporter natABCDE	PM
EAQ73972.1	3.A.1	ABC	The ATP-binding Cassette (ABC) Superfamily	membrane	natC		amino acid	PM	SGL_RS06015	urea ABC-transporter urtABCDE	PM
EAQ73973.1	3.A.1	ABC	The ATP-binding Cassette (ABC) Superfamily	membrane	natD		amino acid	PM	SGL_RS11390	neutral amino acid ABC-transporter natABCDE	PM	SGL_RS11390	neutral amino acid ABC-transporter natABCDE	PM
EAQ73974.1	3.A.1	ABC	The ATP-binding Cassette (ABC) Superfamily	substrate binding	natB		amino acid	PM
EAQ76546.1	3.A.1	ABC	The ATP-binding Cassette (ABC) Superfamily	ABC	nrtC	nitrate/nitrite ABC-transporter nrtABCD	inorganic anion	PM	SGL_RS06585	nitrate/nitrite ABC-transporter nrtABCD	PM	SGL_RS06585	nitrate/nitrite ABC-transporter nrtABCD	PM
EAQ76547.1	3.A.1	ABC	The ATP-binding Cassette (ABC) Superfamily	ABC	nrtD		inorganic anion	PM	SGL_RS06580	nitrate/nitrite ABC-transporter nrtABCD	PM	SGL_RS06580	nitrate/nitrite ABC-transporter nrtABCD	PM
EAQ76545.1	3.A.1	ABC	The ATP-binding Cassette (ABC) Superfamily	membrane	nrtB, cmpB		inorganic anion	PM	SGL_RS06590	nitrate/nitrite ABC-transporter nrtABCD	PM	SGL_RS06590	nitrate/nitrite ABC-transporter nrtABCD	PM
EAQ76544.1	3.A.1	ABC	The ATP-binding Cassette (ABC) Superfamily	substrate binding	nrtA		inorganic anion	PM				SGL_RS06595	nitrate/nitrite ABC-transporter nrtABCD	PM
EAQ76635.1	3.A.1	ABC	The ATP-binding Cassette (ABC) Superfamily	ABC	dppF?, yejF	peptide ABC-transporter ABC-component	other	PM	SGL_RS05330	ABC-transporter ABC-component	PM	SGL_RS05330	ABC-transporter ABC-component	PM
EAQ74554.1	3.A.1	ABC	The ATP-binding Cassette (ABC) Superfamily	ABC	phoT, pstB, pstB2	phosphate ABC-transporter pstABCS	inorganic anion	PM	SGL_RS14185	phosphate ABC-transporter pstABCS	PM	SGL_RS08405	phosphate ABC-transporter pstABCS	PM
EAQ73573.1	3.A.1	ABC	The ATP-binding Cassette (ABC) Superfamily	membrane	pstC		inorganic anion	PM	SGL_RS14195	phosphate ABC-transporter pstABCS	PM	SGL_RS08395	phosphate ABC-transporter pstABCS	PM
EAQ74552.1	3.A.1	ABC	The ATP-binding Cassette (ABC) Superfamily	membrane	pstC		inorganic anion	PM	SGL_RS14195	phosphate ABC-transporter pstABCS	PM	SGL_RS14195	phosphate ABC-transporter pstABCS	PM
EAQ74553.1	3.A.1	ABC	The ATP-binding Cassette (ABC) Superfamily	membrane	pstA, phoT		inorganic anion	PM	SGL_RS14190	phosphate ABC-transporter pstABCS	PM	SGL_RS08400	phosphate ABC-transporter pstABCS	PM
EAQ75434.1	3.A.1	ABC	The ATP-binding Cassette (ABC) Superfamily	substrate binding	pstS, phoS, pstS1, pstB		inorganic anion	PM	SGL_RS14200	phosphate ABC-transporter pstABCS	PM
EAQ75702.1	3.A.1	ABC	The ATP-binding Cassette (ABC) Superfamily	substrate binding	pstS, phoS, pstS2		inorganic anion	PM	SGL_RS14200	phosphate ABC-transporter pstABCS	PM	SGL_RS08390	phosphate ABC-transporter pstABCS	PM
EAQ75048.1	3.A.1	ABC	The ATP-binding Cassette (ABC) Superfamily	ABC	phnC, macB?	phosphonate ABC-transporter phnDCE	inorganic anion	PM							Gebhard and Cook 2008
EAQ75046.1	3.A.1	ABC	The ATP-binding Cassette (ABC) Superfamily	substrate binding	phnD		inorganic anion	PM							Gebhard and Cook 2008
EAQ74184.1	2.A.66	MOP	The Multidrug/Oligosaccharidyl-lipid/Polysaccharide (MOP) Flippase Superfamily	PST		polysaccharide/lipopolysaccharide flippase	lipid/cell wall components	PM
EAQ76281.1	2.A.37	CPA2	The Monovalent Cation:Proton Antiporter-2 (CPA2) Family		kef, kchX	potassium /proton antiporter	ion/metal	PM	SGL_RS04870	VIC-type potassium channel	PM
EAQ73745.1	9.B.73	CemA	Chloroplast Envelope/Cyanobacterial Membrane Protein (CemA) Family		pxcA, cotA	proton extrusion protein pxcA	ion/metal	PM	SGL_RS04025	proton extrusion protein pxcA	PM	SGL_RS04025	proton extrusion protein pxcA	PM
EAQ74632.1	9.A.8	FeoB	The Ferrous Iron Uptake (FeoB) Family			putative feoB-type iron transporter	ion/metal	PM	SGL_RS17195	putative feoB-type iron transporter	PM	SGL_RS17195	putative feoB-type iron transporter	PM
EAQ76517.1	1.A.23	MscS	The Small Conductance Mechanosensitive Ion Channel (MscS) Family			putative ion channel mscS	ion/metal	PM	SGL_RS15615	mscS-type channel	PM
EAQ75134.1	2.A.6	RND	The Resistance-Nodulation-Cell Division (RND) Superfamily	HAE1		RND-family multidrug transporter	multidrug	PM	SGL_RS09605	RND-family multidrug transporter	PM	SGL_RS09605	RND-family multidrug transporter	PM
EAQ76311.1	2.A.6	RND	The Resistance-Nodulation-Cell Division (RND) Superfamily	HAE1		RND-family multidrug transporter	multidrug	PM	SGL_RS09605	RND-family multidrug transporter	PM	SGL_RS12200	RND-family oligsaccharide transporter	PM
EAQ76314.1	2.A.6	RND	The Resistance-Nodulation-Cell Division (RND) Superfamily	HAE1		RND-family multidrug transporter	multidrug	PM	SGL_RS12895	RND-family multidrug transporter	PM
EAQ76698.1	2.A.6	RND	The Resistance-Nodulation-Cell Division (RND) Superfamily	HAE1		RND-family multidrug transporter	multidrug	PM	SGL_RS09605	RND-family multidrug transporter	PM	SGL_RS16065	nickel efflux permease nrsAB + OM-pore nrsC	PM
EAQ75571.1	2.A.83	SBT	The Na+-dependent Bicarbonate Transporter (SBT) Family		sbtA, slr1512	sodium/bicarbonate symporter sbtA	inorganic anion	PM	SGL_RS09335	sodium/bicarbonate symporter sbtA	PM	SGL_RS09335	sodium/bicarbonate symporter sbtA	PM
EAQ75032.1	2.A.83	SBT	The Na+-dependent Bicarbonate Transporter (SBT) Family		sbtA, slr1512	sodium/bicarbonate symporter sbtA-like	inorganic anion	PM	SGL_RS09335	sodium/bicarbonate symporter sbtA	PM
EAQ74890.1	2.A.36	CPA1	The Monovalent Cation:Proton Antiporter-1 (CPA1) Family		nhaS2, nhaP2	sodium/proton antiporter NhaS2	ion/metal	PM	SGL_RS11825	sodium/proton antiporter NhaS2	PM
EAQ76282.1	2.A.37	CPA2	The Monovalent Cation:Proton Antiporter-2 (CPA2) Family		nhaS5	sodium/proton antiporter NhaS5	ion/metal	PM	SGL_RS14155	sodium/proton antiporter NhaS3	TM	SGL_RS14400	sodium/proton antiporter NhaS5	PM
EAQ76240.1	3.A.1	ABC	The ATP-binding Cassette (ABC) Superfamily	ABC	lacK, malK	sugar ABC-transporter lacEFGK	sugar-(P)	PM	SGL_RS06675	sugar ABC-transporter	PM	SGL_RS06675	sugar ABC-transporter	PM	Nieves-Morión and Flores 2017
EAQ74590.1	3.A.1	ABC	The ATP-binding Cassette (ABC) Superfamily	membrane	lacF, msmF		sugar-(P)	PM	SGL_RS06020	sugar ABC-transporter	PM	SGL_RS06020	sugar ABC-transporter	PM	Nieves-Morión and Flores 2017
EAQ75031.1	3.A.1	ABC	The ATP-binding Cassette (ABC) Superfamily	membrane	lacG, msmG		sugar-(P)	PM	SGL_RS08790	sugar ABC-transporter	PM	SGL_RS08790	sugar ABC-transporter	PM	Nieves-Morión and Flores 2017
EAQ75865.1	3.A.1	ABC	The ATP-binding Cassette (ABC) Superfamily	substrate binding	malE-like	sugar ABC-transporter substrate binding component	sugar-(P)	PM	SGL_RS05880	sugar ABC-transporter substrate binding component	PM	SGL_RS05880	sugar ABC-transporter substrate binding component	PM
EAQ76414.1	2.A.53	SulP	The Sulfate Permease (SulP) Family			sulP-family sulfate transporter	inorganic anion	PM	SGL_RS02930	sulP-family sulfate transporter	PM
EAQ76520.1	2.A.53	SulP	The Sulfate Permease (SulP) Family		sulP	sulP-family sulfate transporter	inorganic anion	PM	SGL_RS02930	sulP-family sulfate transporter	PM	SGL_RS02930	sulP-family sulfate transporter	PM
EAQ75922.1	3.A.1	ABC	The ATP-binding Cassette (ABC) Superfamily	ABC	nrtD	taurine ABC-transporter	other	PM	SGL_RS05565	sulfonate ABC-transporter	PM	SGL_RS05565	sulfonate ABC-transporter	PM
EAQ75921.1	3.A.1	ABC	The ATP-binding Cassette (ABC) Superfamily	membrane			other	PM	SGL_RS05570	sulfonate ABC-transporter	PM	SGL_RS05570	sulfonate ABC-transporter	PM
EAQ74604.1	3.A.1	ABC	The ATP-binding Cassette (ABC) Superfamily	ABC	evrA	The ethyl (methyl; benzyl) viologen export pump, EvrABC	other	PM	SGL_RS05900	The ethyl (methyl; benzyl) viologen export pump, EvrABC (Prosecka et al., 2009)	PM	SGL_RS05900	The ethyl (methyl; benzyl) viologen export pump, EvrABC (Prosecka et al., 2009)	PM
EAQ74602.1	3.A.1	ABC	The ATP-binding Cassette (ABC) Superfamily	membrane	evrC		other	PM	SGL_RS18385	The ethyl (methyl; benzyl) viologen export pump, EvrABC (Prosecka et al., 2009)	PM	SGL_RS18385	The ethyl (methyl; benzyl) viologen export pump, EvrABC (Prosecka et al., 2009)	PM
EAQ74603.1	3.A.1	ABC	The ATP-binding Cassette (ABC) Superfamily	membrane	evrB		other	PM	SGL_RS11075	The ethyl (methyl; benzyl) viologen export pump, EvrABC (Prosecka et al., 2009)	PM	SGL_RS11075	The ethyl (methyl; benzyl) viologen export pump, EvrABC (Prosecka et al., 2009)	PM
EAQ73577.1	3.A.1	ABC	The ATP-binding Cassette (ABC) Superfamily	membrane	evrC	The ethyl (methyl; benzyl) viologen export pump, EvrABC (2)	other	PM	SGL_RS18385	The ethyl (methyl; benzyl) viologen export pump, EvrABC (Prosecka et al., 2009)	PM
EAQ73578.1	3.A.1	ABC	The ATP-binding Cassette (ABC) Superfamily	membrane	evrB		other	PM	SGL_RS11075	The ethyl (methyl; benzyl) viologen export pump, EvrABC (Prosecka et al., 2009)	PM
EAQ74125.1	3.A.1	ABC	The ATP-binding Cassette (ABC) Superfamily	ABC+membrane	hlyB	toxin secretion ABC-transporter	multidrug	PM	SGL_RS10630	toxin secretion ABC-transporter hlyBD+ OM pore tolC	PM
EAQ75817.1	3.A.1	ABC	The ATP-binding Cassette (ABC) Superfamily	ABC+membrane	hlyB		multidrug	PM	SGL_RS10630	toxin secretion ABC-transporter hlyBD+ OM pore tolC	PM	SGL_RS02045	heterodimeric multidrug efflux ABC-transporter 1	PM
EAQ75882.1	3.A.1	ABC	The ATP-binding Cassette (ABC) Superfamily	ABC	urtE, braG, livF, livFH	urea ABC-transporter urtABCDE	other	PM	SGL_RS14500	urea ABC-transporter urtABCDE	PM	SGL_RS14500	urea ABC-transporter urtABCDE	PM
EAQ75883.1	3.A.1	ABC	The ATP-binding Cassette (ABC) Superfamily	ABC	urtD, livG		other	PM	SGL_RS13090	urea ABC-transporter urtABCDE	PM	SGL_RS13090	urea ABC-transporter urtABCDE	PM
EAQ75884.1	3.A.1	ABC	The ATP-binding Cassette (ABC) Superfamily	membrane	urtC, livM, slr1201		other	PM	SGL_RS06015	urea ABC-transporter urtABCDE	PM	SGL_RS06015	urea ABC-transporter urtABCDE	PM
EAQ75885.1	3.A.1	ABC	The ATP-binding Cassette (ABC) Superfamily	membrane	urtB		other	PM	SGL_RS06010	urea ABC-transporter urtABCDE	PM	SGL_RS06010	urea ABC-transporter urtABCDE	PM
EAQ75886.1	3.A.1	ABC	The ATP-binding Cassette (ABC) Superfamily	substrate binding	urtA		other	PM	SGL_RS11810	urea ABC-transporter urtABCDE	PM	SGL_RS11810	urea ABC-transporter urtABCDE	PM
EAQ75888.1	3.A.1	ABC	The ATP-binding Cassette (ABC) Superfamily	substrate binding	urtA		other	PM	SGL_RS11810	urea ABC-transporter urtABCDE	PM	SGL_RS14915	neutral amino acid ABC-transporter natABCDE	PM
EAQ73580.1	1.A.1	VIC	The Voltage-gated Ion Channel (VIC) Superfamily		kef, kchX	VIC-type potassium channel	ion/metal	PM	SGL_RS04870	VIC-type potassium channel	PM	SGL_RS04870	VIC-type potassium channel	PM
EAQ74971.1	1.A.1	VIC	The Voltage-gated Ion Channel (VIC) Superfamily		kef, kchX	VIC-type potassium channel	ion/metal	PM	SGL_RS04870	VIC-type potassium channel	PM
EAQ73796.1	2.A.86	AI-2E	The Autoinducer-2 Exporter (AI-2E) Family (Formerly the PerM Family, TC #9.B.22)			AI-2E-family transporter	unknown	TM	SGL_RS15570	AI-2E-family transporter		SGL_RS13900	AI-2E-family transporter	TM
EAQ73969.1	2.A.19	CaCA	The Ca2+:Cation Antiporter (CaCA) Family		cax, synCAX	CaCa-family calcium/proton antiporter	ion/metal	TM	SGL_RS10015	CaCa-family calcium/proton antiporter	TM
EAQ74054.1	2.A.19	CaCA	The Ca2+:Cation Antiporter (CaCA) Family		cax, synCAX	CaCa-family calcium/proton antiporter	ion/metal	TM	SGL_RS10015	CaCa-family calcium/proton antiporter	TM	SGL_RS10015	CaCa-family calcium/proton antiporter	TM
EAQ74768.1	2.A.36	CPA1	The Monovalent Cation:Proton Antiporter-1 (CPA1) Family		nhaP, nhaS1	low-affinity sodium/proton antiporter NhaS1	ion/metal	TM	SGL_RS08850	low-affinity sodium/proton antiporter NhaS1	TM	SGL_RS08850	low-affinity sodium/proton antiporter NhaS1	TM
EAQ74660.1	9.B.14	HHP	The Heme Handling Protein (HHP) Family	membrane	ycf5, ccsA	putative HHP-family heme transporter	other	TM	SGL_RS04050	putative HHP-family heme transporter	TM	SGL_RS04050	putative HHP-family heme transporter	TM
EAQ75845.1	2.A.36	CPA1	The Monovalent Cation:Proton Antiporter-1 (CPA1) Family		nhaS6	sodium/proton antiporter	ion/metal	TM	SGL_RS14920	sodium/proton antiporter NhaS6	TM
EAQ75911.1	2.A.37	CPA2	The Monovalent Cation:Proton Antiporter-2 (CPA2) Family		nhaS3, napA1	sodium/proton antiporter NhaS3	ion/metal	TM	SGL_RS14155	sodium/proton antiporter NhaS3	TM	SGL_RS04015	sodium/proton antiporter NhaS4
EAQ74695.1	2.A.36	CPA1	The Monovalent Cation:Proton Antiporter-1 (CPA1) Family		nhaS6	sodium/proton antiporter NhaS6	ion/metal	TM	SGL_RS14920	sodium/proton antiporter NhaS6	TM	SGL_RS14920	sodium/proton antiporter NhaS6	TM
EAQ74617.1	2.A.86	AI-2E	The Autoinducer-2 Exporter (AI-2E) Family (Formerly the PerM Family, TC #9.B.22)			AI-2E-family transporter	unknown		SGL_RS13185	AI-2E-family transporter
EAQ74618.1	2.A.86	AI-2E	The Autoinducer-2 Exporter (AI-2E) Family (Formerly the PerM Family, TC #9.B.22)			AI-2E-family transporter	unknown		SGL_RS13185	AI-2E-family transporter		SGL_RS13185	AI-2E-family transporter
EAQ76053.1	2.A.86	AI-2E	The Autoinducer-2 Exporter (AI-2E) Family (Formerly the PerM Family, TC #9.B.22)			AI-2E-family transporter	unknown		SGL_RS15570	AI-2E-family transporter
EAQ74384.1	3.A.1	ABC	The ATP-binding Cassette (ABC) Superfamily	substrate binding	natF-like?	amino acid ABC-transporter, substrate binding	amino acid
EAQ76561.1	2.A.3	APC	The Amino Acid-Polyamine-Organocation (APC) Family			amino acid transporter	amino acid
EAQ76496.1	2.A.85	ArAE	The Aromatic Acid Exporter (ArAE) Family			ArAE-family transporter	other
EAQ74635.1	2.A.88	BUT	The Biotin Uptake Transporter (BUT) Family			biotin uptake transporter bioY	other		SGL_RS07060	biotin uptake transporter bioY		SGL_RS07060	biotin uptake transporter bioY
EAQ73512.1	2.A.19	CaCA	The Ca2+:Cation Antiporter (CaCA) Family			CaCa-family calcium/sodium antiporter	ion/metal		SGL_RS03865	CaCa-family calcium/sodium antiporter
EAQ74839.1	2.A.19	CaCA	The Ca2+:Cation Antiporter (CaCA) Family			CaCa-family calcium/sodium antiporter	ion/metal		SGL_RS03865	CaCa-family calcium/sodium antiporter		SGL_RS03865	CaCa-family calcium/sodium antiporter
EAQ73541.1	2.A.4	CDF	The Cation Diffusion Facilitator (CDF) Family			CDF-family cation efflux system	ion/metal
EAQ74467.1	2.A.4	CDF	The Cation Diffusion Facilitator (CDF) Family			CDF-family cation efflux system	ion/metal
EAQ73613.1	3.A.3	P-ATPase	The P-type ATPase (P-ATPase) Superfamily		ctaA	copper transporting P-type ATPase	ion/metal		SGL_RS12475	copper-translocating P-type ATPase ctaA
EAQ75334.1	3.A.3	P-ATPase	The P-type ATPase (P-ATPase) Superfamily		ctaA	copper-translocating P-type ATPase ctaA	ion/metal		SGL_RS12475	copper-translocating P-type ATPase ctaA		SGL_RS12475	copper-translocating P-type ATPase ctaA
EAQ74482.1	2.A.7	DMT	The Drug/Metabolite Transporter (DMT) Superfamily			DME-family drug/metabolite transporter	unknown		SGL_RS12065	DME-family drug/metabolite transporter		SGL_RS12065	DME-family drug/metabolite transporter
EAQ75092.1	2.A.7	DMT	The Drug/Metabolite Transporter (DMT) Superfamily			DME-family drug/metabolite transporter	unknown					SGL_RS02735	DME-family drug/metabolite transporter
EAQ73956.1	2.A.7	DMT	The Drug/Metabolite Transporter (DMT) Superfamily			DMT-family drug/metabolite transporter	unknown		SGL_RS08325	DMT-family drug/metabolite transporter		SGL_RS08325	DMT-family drug/metabolite transporter
EAQ76289.1	2.A.7	DMT	The Drug/Metabolite Transporter (DMT) Superfamily			DMT-family drug/metabolite transporter	unknown
EAQ76298.1	2.A.7	DMT	The Drug/Metabolite Transporter (DMT) Superfamily			DMT-family drug/metabolite transporter	unknown
EAQ74897.1	3.A.1	ABC	The ATP-binding Cassette (ABC) Superfamily	membrane+substrate binding		Glycine betaine, Proline ABC-transporter	other
EAQ75959.1	3.A.1	ABC	The ATP-binding Cassette (ABC) Superfamily	ABC+membrane (putative)		homodimeric multidrug efflux ABC-transporter, partial	multidrug
EAQ73782.1	1.A.23	MscS	The Small Conductance Mechanosensitive Ion Channel (MscS) Family			ion channel mscS	ion/metal
EAQ73930.1	1.A.23	MscS	The Small Conductance Mechanosensitive Ion Channel (MscS) Family			ion channel mscS	ion/metal
EAQ76516.1	1.A.23	MscS	The Small Conductance Mechanosensitive Ion Channel (MscS) Family			ion channel mscS	ion/metal
EAQ75969.1	3.A.1	ABC	The ATP-binding Cassette (ABC) Superfamily	ABC+membrane		lipid A ABC-exporter msbA-like, partial	lipid/cell wall components
EAQ76278.1	1.A.35	MIT	The CorA Metal Ion Transporter (MIT) Family		corA, sll0671	magnesium transporter CorA	ion/metal		SGL_RS16275	magnesium transporter CorA		SGL_RS16275	magnesium transporter CorA
EAQ74997.1	2.A.1	MFS	The Major Facilitator Superfamily (MFS)			MFS-family multidrug transporter	multidrug
EAQ75297.1	2.A.1	MFS	The Major Facilitator Superfamily (MFS)			MFS-family multidrug transporter	multidrug
EAQ75426.1	2.A.1	MFS	The Major Facilitator Superfamily (MFS)			MFS-family multidrug transporter	multidrug
EAQ75688.1	2.A.1	MFS	The Major Facilitator Superfamily (MFS)			MFS-family multidrug transporter	multidrug		SGL_RS08385	MFS-family multidrug transporter		SGL_RS08385	MFS-family multidrug transporter
EAQ76092.1	2.A.1	MFS	The Major Facilitator Superfamily (MFS)			MFS-family multidrug transporter	multidrug		SGL_RS12350	MFS-family multidrug transporter		SGL_RS12350	MFS-family multidrug transporter
EAQ73500.1	2.A.1	MFS	The Major Facilitator Superfamily (MFS)			MFS-family nitrite/nitrate transporter	inorganic anion
EAQ76210.1	2.A.1	MFS	The Major Facilitator Superfamily (MFS)			MFS-family peptide/peptidoglycan uptake transporter	other
EAQ75286.1	2.A.1	MFS	The Major Facilitator Superfamily (MFS)			MFS-family pigment transporter	other		SGL_RS08630	MFS-family pigment transporter		SGL_RS03230	MFS-family transporter
EAQ74751.1	3.A.1	ABC	The ATP-binding Cassette (ABC) Superfamily	ABC+membrane	slr1488	multidrug efflux ABC- transporter	multidrug		SGL_RS05640	heterodimeric multidrug efflux ABC-transporter 2	PM	SGL_RS02015	multidrug efflux ABC-transporter	PM	Braakman et al. 2017
EAQ73715.1	3.A.1	ABC	The ATP-binding Cassette (ABC) Superfamily	ABC	cmrA	multidrug efflux ABC-transporter cmrAB	multidrug		SGL_RS13110	multidrug efflux ABC-transporter	TM
EAQ74509.1	3.A.1	ABC	The ATP-binding Cassette (ABC) Superfamily	membrane	cmrB		multidrug		SGL_RS13105	multidrug efflux ABC-transporter	TM	SGL_RS13105	multidrug efflux ABC-transporter	TM
EAQ74508.1	3.A.1	ABC	The ATP-binding Cassette (ABC) Superfamily	ABC	cmrA		multidrug		SGL_RS13110	multidrug efflux ABC-transporter	TM	SGL_RS02120	ABC-transporter ABC-component	PM
EAQ74462.1	2.A.20	PiT	The Inorganic Phosphate Transporter (PiT) Family			PiT-family phosphate transporter	inorganic anion
EAQ75167.1	1.A.35	MIT	The CorA Metal Ion Transporter (MIT) Family			putative magnesium transporter CorA	ion/metal
EAQ76489.1	4.A	GPTS	Phosphotransfer-driven Group Translocator (PTS)	EnzymeI		putative N-acetyl glucosamine group translocator component	unknown
EAQ75619.1	2.A.116	GAP	The Peptidoglycolipid Addressing Protein (GAP) Family			putative petidoglycolipid exporter	lipid/cell wall components
EAQ74573.1	9.A.4	YggT	The YggT or Fanciful K+ Uptake-B (FkuB; YggT) Family			putative potassium uptake transporter YggT	ion/metal ?		SGL_RS03240	putative potassium uptake transporter YggT		SGL_RS03240	putative potassium uptake transporter YggT
EAQ76262.1	9.A.4	YggT	The YggT or Fanciful K+ Uptake-B (FkuB; YggT) Family			putative potassium uptake transporter YggT	ion/metal ?		SGL_RS14625	putative potassium uptake transporter YggT		SGL_RS14625	putative potassium uptake transporter YggT
EAQ76359.1	3.A.1	ABC	The ATP-binding Cassette (ABC) Superfamily	substrate binding		putative substrate binding protein	unknown
EAQ75407.1	2.A.28	BASS	The Bile Acid:Na+ Symporter (BASS) Family			sodium ion/bile acid transporter	other		SGL_RS09250	sodium ion/bile acid transporter
EAQ76366.1	2.A.28	BASS	The Bile Acid:Na+ Symporter (BASS) Family			sodium ion/bile acid transporter	other		SGL_RS09250	sodium ion/bile acid transporter		SGL_RS09250	sodium ion/bile acid transporter
EAQ76521.1	2.A.28	BASS	The Bile Acid:Na+ Symporter (BASS) Family			sodium ion/bile acid transporter	other		SGL_RS09250	sodium ion/bile acid transporter
EAQ74053.1	2.A.27	ESS	The Glutamate:Na+ Symporter (ESS) Family		gltS	sodium/glutamate symporter	amino acid		SGL_RS05620	sodium/glutamate symporter		SGL_RS05620	sodium/glutamate symporter
EAQ73527.1	2.A.25	AGCS	The Alanine or Glycine:Cation Symporter (AGCS) Family			sodium/glycine or alanine symporter	amino acid
EAQ75170.1	2.A.58	PNaS	The Phosphate:Na+ Symporter (PNaS) Family			sodium/phosphate symporter	inorganic anion
EAQ73521.1	2.A.53	SulP	The Sulfate Permease (SulP) Family			sulP-family sulfate transporter	inorganic anion
EAQ73797.1	2.A.53	SulP	The Sulfate Permease (SulP) Family			sulP-family sulfate transporter	inorganic anion		SGL_RS06705	sulP-family sulfate transporter		SGL_RS06705	sulP-family sulfate transporter
EAQ75428.1	2.A.119	ArsP	The Organo-Arsenical Exporter (ArsP) Family	membrane		uncharacterized permease	unknown
EAQ76675.1	1.A.1	VIC	The Voltage-gated Ion Channel (VIC) Superfamily			VIC-type potassium channel	ion/metal
EAQ74601.1	2.A.89	VIT	The Vacuolar Iron Transporter (VIT) Family			VIT-family iron transporter	ion/metal

## Sheet: Synechocystis PCC6803
Table S2: The table lists transporters and transport systems for ions and metabolites that could be identified in the genome of the model cyanobacterium Synechocystis sp. PCC6803.
The list contains transporters or transport systems predicted in the genome of Synechocystis sp. PCC6803 (GenBank assembly accession: GCA_000340785.1) with TransAAP (Elbourne et al. 2017), classified according to the Transporter Classification Database (TCDB, Saier et al. 2016), and curated manually. The TCDB-Number, abbreviated and full family name, as well as common gene name are provided. For …
Protein	CyanobaseID	TCDB #	Transporter Family	Transporter Family	Subfamily/Subunit	Gene	Transporter/Transport system	Putative substrate	Substrate group (Fig.1)	Putative localization	Pisareva et al. 2011 (PM/TM)	Liberton et al. 2016 (PM/TM enrichment analysis)	Baers et al. 2019 (advanced cell fractionation)	Plohnke et al. 2015 (Whole cell membranes)	Choi et al. 2019 (WCM, no list of all proteins available)	Literature / Comment
SGL_RS06365	slr1841	1.B.23	CBP	The Cyanobacterial Porin (CBP) Family	beta-barrel pore	oprB1	bicarbonate-selective porin	bicarbonate	inorganic anion	OM	PM	PM	Unknown	slr1841	slr1841	Huang et al. 2004, Nicolaisen et al. 2009
SGL_RS10675	slr1272	1.B.23	CBP	The Cyanobacterial Porin (CBP) Family	beta-barrel pore	porin2, somA	bicarbonate-selective porin	bicarbonate	inorganic anion	OM		PM	Unknown			Huang et al. 2004
SGL_RS16575	slr0042	1.B.23	CBP	The Cyanobacterial Porin (CBP) Family	beta-barrel pore	oprB5	bicarbonate-selective porin	bicarbonate	inorganic anion	OM		PM			slr0042	Nicolaisen et al. 2009
SGL_RS01950	sll1206	1.B.14	OMR	The Outer Membrane Receptor (OMR) Family	beta-barrel pore	iutA/schT	iron-selective ligand gated channel, works with ABC-transporter FecBCD	iron	ion/metal	OM						Qiu et al. 2018, Nicolaisen et al. 2009
SGL_RS04720	slr1908	1.B.23	CBP	The Cyanobacterial Porin (CBP) Family	beta-barrel pore	oprB2, somA	iron-selective porin	iron	ion/metal	OM	PM	PM	Unknown		slr1908	Huang et al. 2004, Nicolaisen et al. 2009
SGL_RS17810	sll1550	1.B.23	CBP	The Cyanobacterial Porin (CBP) Family	beta-barrel pore	oprB4	iron-selective porin	iron	ion/metal	OM		PM	Unknown		sll1550	Nicolaisen et al. 2009
SGL_RS07085	sll1271	1.B.23	CBP	The Cyanobacterial Porin (CBP) Family	beta-barrel pore	oprB6, somA	iron-selective porin	iron	ion/metal	OM						Qiu et al. 2018
SGL_RS13040	sll0772	1.B.23	CBP	The Cyanobacterial Porin (CBP) Family	beta-barrel pore	oprB3	iron-selective porin	iron	ion/metal	OM					sll0772	Nicolaisen et al. 2009
SGL_RS01975	sll1409	1.B.14	OMR	The Outer Membrane Receptor (OMR) Family	beta-barrel pore	fhuA2	iron-selective TonB-dependent siderophore receptor	iron	ion/metal	OM			Unknown			Qiu et al. 2018, Nicolaisen et al. 2009
SGL_RS02025	slr1490	1.B.14	OMR	The Outer Membrane Receptor (OMR) Family	beta-barrel pore	fhuA3	iron-selective TonB-dependent siderophore receptor	iron	ion/metal	OM			Unknown			Qiu et al. 2018, Nicolaisen et al. 2009
SGL_RS01990	sll1406	1.B.14	OMR	The Outer Membrane Receptor (OMR) Family	beta-barrel pore	fhuA1	iron-selective TonB-dependent siderophore receptor, works with ExbB/ExbD	iron	ion/metal	OM			Unknown			Qiu et al. 2018, Huang et al. 2004, Nicolaisen et al. 2009
SGL_RS05210	sll1581	1.B.18	OMA	The Outer Membrane Auxiliary (OMA) Protein Family	beta-barrel pore	oma/gumB	OM- sugar binding protein	polysaccharides	sugar-(P)	OM		PM	Soluble	sll1581		Huang et al. 2004
SGL_RS12875	sll0350	1.B.42	LPS-EP	The Outer Membrane Lipopolysaccharide Export Porin (LPS-EP) Family	beta-barrel pore	ostA, lptD	Outer Membrane Lipopolysaccharide Export Porin	lipopolysaccharides	lipid/cell wall components	OM		PM				Nicolaisen et al. 2009
SGL_RS17875	slr1661	1.B.20	TPS	The Two-partner Secretion (TPS) Family	beta-barrel pore	fhaC	peptide/protein secretion/activation OM-pore	protein/peptide	other	OM		PM	Unknown			Nicolaisen et al. 2009
SGL_RS10665	slr1270	1.B.17	OMF	The Outer Membrane Factor (OMF) Family	beta-barrel pore	hgdD, tolC	porin for glycolipid secretion, works with ABC-transporter DevABC	glycolipids, multidrug	lipid/cell wall components	OM		PM	PM	slr1270	slr1270	Huang et al. 2004, Nicolaisen et al. 2009
SGL_RS10985	slr1163	1.B.19	OprB	The Glucose-selective OprB Porin (OprB) Family	beta-barrel pore	oprB7	sugar-selective porin	sugars	sugar-(P)	OM				slr1163		Wylie and Worobec 1995
SGL_RS15390	sll0489	3.A.1	ABC	The ATP-binding Cassette (ABC) Superfamily	ABC	(gldA)	ABC-exporter	unknown	unknown	PM		PM	PM
SGL_RS13235	slr0347	3.A.1	ABC	The ATP-binding Cassette (ABC) Superfamily	membrane	gldF(G)		unknown	unknown	PM
SGL_RS13685	sll0415	3.A.1	ABC	The ATP-binding Cassette (ABC) Superfamily	ABC	pilH	ABC-exporter 2	unknown	unknown	PM	PM	PM	PM
SGL_RS18180	sll1107	3.A.1	ABC	The ATP-binding Cassette (ABC) Superfamily	membrane	pilI		unknown	unknown	PM			Unknown
SGL_RS14635	sll0182	3.A.1	ABC	The ATP-binding Cassette (ABC) Superfamily	ABC+membrane	sll0182	ABC-transporter for fatty acyl CoA or antimicrobial peptides	fatty acyl CoA/antimicrobial peptides	unknown	PM	TM	PM	PM			most similar to PCC0669
SGL_RS07470	slr1864	2.A.69	AEC	The Auxin Efflux Carrier (AEC) Family			AEC-type transporter	unknown	unknown
SGL_RS10785	sll1166	2.A.86	AI-2E	The Autoinducer-2 Exporter (AI-2E) Family (Formerly the PerM Family, TC #9.B.22)			AI-2E-family transporter	unknown	unknown	PM			PM
SGL_RS13900	sll0063	2.A.86	AI-2E	The Autoinducer-2 Exporter (AI-2E) Family (Formerly the PerM Family, TC #9.B.22)			AI-2E-family transporter	unknown	unknown	TM		TM	TM
SGL_RS15570	sll0597	2.A.86	AI-2E	The Autoinducer-2 Exporter (AI-2E) Family (Formerly the PerM Family, TC #9.B.22)			AI-2E-family transporter	unknown	unknown				Unknown
SGL_RS13935	sll0060	2.A.86	AI-2E	The Autoinducer-2 Exporter (AI-2E) Family (Formerly the PerM Family, TC #9.B.22)			AI-2E-family transporter	unknown	unknown
SGL_RS14015	sll0462	2.A.86	AI-2E	The Autoinducer-2 Exporter (AI-2E) Family (Formerly the PerM Family, TC #9.B.22)			AI-2E-family transporter	unknown	unknown
SGL_RS13185	slr0784	2.A.86	AI-2E	The Autoinducer-2 Exporter (AI-2E) Family (Formerly the PerM Family, TC #9.B.22)			AI-2E-family transporter	unknown	unknown
SGL_RS11515	slr1627	2.A.76	RhtB	The Resistance to Homoserine/Threonine (RhtB) Family			amino acid efflux permease	amino acid	amino acid
SGL_RS16220	slr0700	2.A.3	APC	The Amino Acid-Polyamine-Organocation (APC) Family			amino acid permease	amino acid	amino acid
SGL_RS15695	sll0108	1.A.11	Amt	The Ammonia Transporter Channel (Amt) Family		amt1, amt	ammonium channel amt1	ammonium	inorganic anion	PM		PM	PM	sll0108	sll0108
SGL_RS03810	sll1017	1.A.11	Amt	The Ammonia Transporter Channel (Amt) Family		amt2	ammonium channel amt2	ammonium	inorganic anion	PM		PM
SGL_RS16895	sll0537	1.A.11	Amt	The Ammonia Transporter Channel (Amt) Family		amt3	ammonium channel amt3	ammonium	inorganic anion	PM		PM
SGL_RS03765	sll1024	1.A.46	Bestrophin	The Anion Channel-forming Bestrophin (Bestrophin) Family			anion channel	anions	ion/metal
SGL_RS08525	slr2057	1.A.8	MIP	The Major Intrinsic Protein (MIP) Family		aqpZ	aquaporin	water	other	PM	PM
SGL_RS03260	slr1298	2.A.85	ArAE	The Aromatic Acid Exporter (ArAE) Family			ArAE-family transporter	unknown	unknown	PM		PM	PM
SGL_RS03090	slr1794	3.A.4	ArsAB	The Arsenite-Antimonite (ArsAB) Efflux Family		arsA	arsenical efflux pump arsAB	arsenite	ion/metal	PM		PM	Soluble
SGL_RS17685	slr0753	3.A.4	ArsAB	The Arsenite-Antimonite (ArsB) Efflux Family		arsB		unknown	ion/metal	PM
SGL_RS11355	slr0944	2.A.59	ACR3	The Arsenical Resistance-3 (ACR3) Family		arsB	arsenite exporter ArsB	arsenite	ion/metal
SGL_RS08035	slr1735	3.A.1	ABC	The ATP-binding Cassette (ABC) Superfamily	ABC	glnQ, bgtA	basic amino acids + glutamine ABC-transporter bgtAB	basic amino acids	amino acid	PM	PM	PM	PM
SGL_RS07090	sll1270	3.A.1	ABC	The ATP-binding Cassette (ABC) Superfamily	membrane + substrate binding	glnHP, bgtB		basic amino acids	amino acid	PM	PM	PM	PM	sll1270	sll1270
SGL_RS16565	slr0040	3.A.1	ABC	The ATP-binding Cassette (ABC) Superfamily	substrate binding	cmpA	bicarbonate ABC-transporter cmpABCD (BCT1)	bicarbonate	inorganic anion	PM	TM, PM	PM	PM		slr0040
SGL_RS16585	slr0044	3.A.1	ABC	The ATP-binding Cassette (ABC) Superfamily	ABC	cmpD		bicarbonate	inorganic anion	PM	PM	PM
SGL_RS16580	slr0043	3.A.1	ABC	The ATP-binding Cassette (ABC) Superfamily	ABC	cmpC		bicarbonate	inorganic anion	PM	PM	PM
SGL_RS16570	slr0041	3.A.1	ABC	The ATP-binding Cassette (ABC) Superfamily	membrane	cmpB		bicarbonate	inorganic anion	PM		PM
SGL_RS15100	sll0834	2.A.53	SulP	The Sulfate Permease (SulP) Family		bicA, sll0834	bicarbonate transporter BicA	bicarbonate	inorganic anion	PM			PM			most similar to PCC0004
SGL_RS15380	slr0096	2.A.53	SulP	The Sulfate Permease (SulP) Family		bicA-like	bicarbonate transporter BicA-like	bicarbonate	inorganic anion
SGL_RS15490	sll0477	1.A.30.	Mot-Exb	The H+- or Na+-translocating Bacterial Flagellar Motor/ExbBD Outer Membrane Transport Energizer (Mot-Exb) Superfamily		exbB	biopolymer transport system ExbB/ExbD/ExbD' 1 (TonB-dependent) + OM pore fhuA	biopolymers	other	PM			PM
SGL_RS15485	sll0478	1.A.30.	Mot-Exb	The H+- or Na+-translocating Bacterial Flagellar Motor/ExbBD Outer Membrane Transport Energizer (Mot-Exb) Superfamily		exbD		biopolymers	other	PM			PM
SGL_RS15480	sll0479	1.A.30.	Mot-Exb	The H+- or Na+-translocating Bacterial Flagellar Motor/ExbBD Outer Membrane Transport Energizer (Mot-Exb) Superfamily		exbD		biopolymers	other	PM			PM
SGL_RS03845	slr0677	1.A.30.	Mot-Exb	The H+- or Na+-translocating Bacterial Flagellar Motor/ExbBD Outer Membrane Transport Energizer (Mot-Exb) Superfamily		exbB2, exbB	biopolymer transport system ExbB/ExbD/ExbD' 2 (TonB-dependent) + OM pore fhuA	biopolymers	other	PM	PM	PM	PM	slr0677
SGL_RS03850	slr0678	1.A.30.	Mot-Exb	The H+- or Na+-translocating Bacterial Flagellar Motor/ExbBD Outer Membrane Transport Energizer (Mot-Exb) Superfamily		exbD		biopolymers	other	PM	PM	PM		slr0678
SGL_RS01995	sll1405	1.A.30.	Mot-Exb	The H+- or Na+-translocating Bacterial Flagellar Motor/ExbBD Outer Membrane Transport Energizer (Mot-Exb) Superfamily		exbD-like	biopolymer transport system ExbB/ExbD/ExbD' 3 (TonB-dependent) + OM pore fhuA	biopolymers	other	PM			PM
SGL_RS02000	sll1404	1.A.30.	Mot-Exb	The H+- or Na+-translocating Bacterial Flagellar Motor/ExbBD Outer Membrane Transport Energizer (Mot-Exb) Superfamily		exbB-like		biopolymers	other	PM			PM
SGL_RS07060	slr1365	2.A.88	BUT	The Biotin Uptake Transporter (BUT) Family	(EcfS)		biotin uptake transporter bioY	biotin	other							most similar to PCC0253
SGL_RS10015	slr1336	2.A.19	CaCA	The Ca2+:Cation Antiporter (CaCA) Family		cax, synCAX	CaCa-family calcium/proton antiporter	Ca(2+)/H(+)	ion/metal	TM		TM	TM
SGL_RS03865	slr0681	2.A.19	CaCA	The Ca2+:Cation Antiporter (CaCA) Family			CaCa-family calcium/sodium antiporter	cations	ion/metal							most similar to PCC0003
SGL_RS16270	sll0672	3.A.3	P-ATPase	The P-type ATPase (P-ATPase) Superfamily		pacL	cation transporting P-type ATPase	cations	ion/metal	PM	PM	PM	PM
SGL_RS08700	sll1614	3.A.3	P-ATPase	The P-type ATPase (P-ATPase) Superfamily		pma1	cation transporting P-type ATPase	cations	ion/metal	PM		PM	PM		sll1614
SGL_RS09955	slr0822	3.A.3	P-ATPase	The P-type ATPase (P-ATPase) Superfamily		pacL	cation transporting P-type ATPase	cations	ion/metal	PM		PM	PM
SGL_RS05605	sll1076	3.A.3	P-ATPase	The P-type ATPase (P-ATPase) Superfamily		pacL, ziaA	cation transporting P-type ATPase	cations	ion/metal	PM		PM	PM		sll1076
SGL_RS05385	slr2011	2.A.63	CPA3	The Monovalent Cation (K+ or Na+):Proton Antiporter-3 (CPA3) Family		mrpA, slr201	cation:proton antiporter mrpABCDEFG	cations	ion/metal	PM	PM	PM	PM
SGL_RS05355	slr2007	2.A.63	CPA3	The Monovalent Cation (K+ or Na+):Proton Antiporter-3 (CPA3) Family	MnhD	ndhD5, ndhD, mrpD		cations	ion/metal	PM			PM
SGL_RS15190	slr0844	2.A.63	CPA3	The Monovalent Cation (K+ or Na+):Proton Antiporter-3 (CPA3) Family	MnhA	ndhF1, ndhF, mrpA		cations	ion/metal	PM		TM	TM	slr0844
SGL_RS05350	slr2006	2.A.63	CPA3	The Monovalent Cation (K+ or Na+):Proton Antiporter-3 (CPA3) Family	MnhC	mrp		cations	ion/metal	PM
SGL_RS05360	slr2008	2.A.63	CPA3	The Monovalent Cation (K+ or Na+):Proton Antiporter-3 (CPA3) Family	MnhC	mrp		cations	ion/metal	PM
SGL_RS05365	slr2009	2.A.63	CPA3	The Monovalent Cation (K+ or Na+):Proton Antiporter-3 (CPA3) Family	MnhD	mrp		cations	ion/metal	PM
SGL_RS05370	slr2010	2.A.63	CPA3	The Monovalent Cation (K+ or Na+):Proton Antiporter-3 (CPA3) Family		mrp		cations	ion/metal	PM
SGL_RS05390	slr2012	2.A.63	CPA3	The Monovalent Cation (K+ or Na+):Proton Antiporter-3 (CPA3) Family		mrp		cations	ion/metal	PM
SGL_RS05375	ssr3409	2.A.63	CPA3	The Monovalent Cation (K+ or Na+):Proton Antiporter-3 (CPA3) Family		mrp		cations	ion/metal	PM
SGL_RS05380	ssr3410	2.A.63	CPA3	The Monovalent Cation (K+ or Na+):Proton Antiporter-3 (CPA3) Family		mrp		cations	ion/metal	PM
SGL_RS09985	sll1263	2.A.4	CDF	The Cation Diffusion Facilitator (CDF) Family		sll1263	CDF-family cation efflux system	cation	ion/metal	PM			PM			most similar to PCC0013
SGL_RS17170	slr1457	2.A.51	CHR	The Chromate Ion Transporter (CHR) Family			chromate transporter	chromate	other
SGL_RS00170	slr5038	2.A.51	CHR	The Chromate Ion Transporter (CHR) Family			chromate transporter	chromate	other
SGL_RS12280	sll1864	2.A.49	ClC	The Chloride Carrier/Channel (ClC) Family			ClC-family chloride channel	chloride	ion/metal	PM	TM, PM		PM
SGL_RS15610	slr0617	2.A.49	ClC	The Chloride Carrier/Channel (ClC) Family			ClC-family chloride channel	chloride	ion/metal	PM			PM		slr0617
SGL_RS08170	sll0855	2.A.49	ClC	The Chloride Carrier/Channel (ClC) Family		clcA	ClC-family chloride/proton antiporter	chloride	ion/metal	PM		PM
SGL_RS10060	sll1254	1.A.112.	CNNM	The Cyclin M Mg2+ Exporter (CNNM) Family			CNNM-family magnesium export channel	magnesium	ion/metal	PM		PM	PM			most similar to PCC0210
SGL_RS11910	sll0260	1.A.112.	CNNM	The Cyclin M Mg2+ Exporter (CNNM) Family			CNNM-family magnesium export channel	magnesium	ion/metal	PM		PM	PM			most similar to PCC0504
SGL_RS14425	sll0385	3.A.1	ABC	The ATP-binding Cassette (ABC) Superfamily	ecfA	cbiO	cobalt ECF-transporter cbiMNOQ	cobalt	ion/metal	PM			Unknown
SGL_RS14435	sll0383	3.A.1	ABC	The ATP-binding Cassette (ABC) Superfamily	ecfT	cbiM		cobalt	ion/metal	PM
SGL_RS14430	sll0384	3.A.1	ABC	The ATP-binding Cassette (ABC) Superfamily	ecfT	cbiQ		cobalt	ion/metal	PM		PM
SGL_RS16085	slr0797	3.A.3	P-ATPase	The P-type ATPase (P-ATPase) Superfamily		coaT, corT, cadA, slr0797	cobalt efflux P-type ATPase corT	cobalt	ion/metal	PM		PM	PM
SGL_RS01565	slr6043	2.A.6	RND	The Resistance-Nodulation-Cell Division (RND) Superfamily	HME	copA, czcA homolog	copper efflux system copAB + OM-pore copC	copper	ion/metal	PM			PM
SGL_RS01560	slr6042	2.A.6	RND	The Resistance-Nodulation-Cell Division (RND) Superfamily	periplasmic adaptor	czcB, copB		copper	ion/metal	PM			Unknown
SGL_RS05435	sll1920	3.A.3	P-ATPase	The P-type ATPase (P-ATPase) Superfamily		pacS	copper transporting P-type ATPase	copper	ion/metal	PM			PM
SGL_RS12475	slr1950	3.A.3	P-ATPase	The P-type ATPase (P-ATPase) Superfamily		ctaA	copper-translocating P-type ATPase ctaA	copper	ion/metal				TM			most similar to PCC0303
SGL_RS03935	sll0640	2.A.47	DASS	The Divalent Anion:Na+ Symporter (DASS) Family		sac1	DASS-family sodium:dicarboxylate/sulfate symporter	sulfate/carboxylates	unknown	PM		PM	PM			most similar to PCC0664
SGL_RS10910	sll1103	2.A.56	TRAP-T	The Tripartite ATP-independent Periplasmic Transporter (TRAP-T) Family	membrane	gtrB, sll1103	dicarboxylate transporter grtABC	glutamate	amino acid	PM			PM
SGL_RS10905	sll1104	2.A.56	TRAP-T	The Tripartite ATP-independent Periplasmic Transporter (TRAP-T) Family	substrate binding	gtrC, glnH, sll1104		glutamate	amino acid	PM		PM	Unknown
SGL_RS10915	sll1102	2.A.56	TRAP-T	The Tripartite ATP-independent Periplasmic Transporter (TRAP-T) Family	substrate binding	grtA		glutamate	amino acid	PM
SGL_RS12065	sll0355	2.A.7	DMT	The Drug/Metabolite Transporter (DMT) Superfamily			DME-family drug/metabolite transporter	unknown	unknown							most similar to PCC0734
SGL_RS02735	sll1319	2.A.7	DMT	The Drug/Metabolite Transporter (DMT) Superfamily	DME		DME-family drug/metabolite transporter	unknown	unknown
SGL_RS16090	sll0793	2.A.7	DMT	The Drug/Metabolite Transporter (DMT) Superfamily			DMT-family drug/metabolite transporter	unknown	unknown
SGL_RS08325	sll1164	2.A.7	DMT	The Drug/Metabolite Transporter (DMT) Superfamily			DMT-family drug/metabolite transporter	unknown	unknown
SGL_RS15535	slr0521	2.A.7	DMT	The Drug/Metabolite Transporter (DMT) Superfamily			DMT-family drug/metabolite transporter	unknown	unknown
SGL_RS08060	sll1623	3.A.1	ABC	The ATP-binding Cassette (ABC) Superfamily	EcfA2	ndhM	ECF-type vitamin or heavy metal importer	cobalt/vitamin?	unknown	PM		PM	PM			most similar to PCC0300/PCC0834
SGL_RS10365	slr1978	3.A.1	ABC	The ATP-binding Cassette (ABC) Superfamily	EcfT			cobalt/vitamin?	unknown	PM			PM			most similar to PCC0049
SGL_RS13290	slr0354	3.A.1	ABC	The ATP-binding Cassette (ABC) Superfamily	EcfA2			cobalt/vitamin?	unknown	PM			Soluble			most similar to PCC0300/PCC0834
SGL_RS14315	slr0642	2.A.71	FBT	The Folate-Biopterin Transporter (FBT) Family		fbp	FBT-type transporter	Biopterin, folate, methotrexate, Aminopterin	other
SGL_RS05125	slr1392	9.A.8	FeoB	The Ferrous Iron Uptake (FeoB) Family		feoB	ferrous iron transporter feoB	iron	ion/metal	PM			PM			most similar to PCC0239
SGL_RS16640	slr0529	3.A.1	ABC	The ATP-binding Cassette (ABC) Superfamily	substrate binding	ggtB	glucosylglycerol/osmolyte ABC-transporter ggtABCD	glucosylglycerol/osmolyte	other	PM	TM	PM	PM
SGL_RS17635	slr0747	3.A.1	ABC	The ATP-binding Cassette (ABC) Superfamily	ABC	ggtA, msiK		glucosylglycerol/osmolyte	other	PM		PM	PM
SGL_RS16650	slr0531	3.A.1	ABC	The ATP-binding Cassette (ABC) Superfamily	membrane	ggtD		glucosylglycerol/osmolyte	other	PM			PM
SGL_RS16645	slr0530	3.A.1	ABC	The ATP-binding Cassette (ABC) Superfamily	membrane	ggtC		glucosylglycerol/osmolyte	other	PM
SGL_RS08465	slr1257	1.A.10	GIC	The Glutamate-gated Ion Channel (GIC) Family of Neurotransmitter Receptors		gluR	glutamate-gated ion channel	potassium	ion/metal	PM		PM	PM
SGL_RS06045	slr1207	1.B.17	OMF	The Outer Membrane Factor (OMF) Family	membrane fusion protein	devB	glycolipid exporter devABC + OM-pore hgdD	unknown (glycolipids?)	lipid/cell wall components	PM	PM	PM	PM
SGL_RS17555	sll1481	3.A.1	ABC	The ATP-binding Cassette (ABC) Superfamily	membrane fusion protein	devB		glycolipids	lipid/cell wall components	PM	PM	PM	PM
SGL_RS15420	sll0484	3.A.1	ABC	The ATP-binding Cassette (ABC) Superfamily	ABC	devA		unknown (glycolipids?)	lipid/cell wall components	PM		TM	Unknown
SGL_RS17550	sll1482	3.A.1	ABC	The ATP-binding Cassette (ABC) Superfamily	membrane	devC		unknown (glycolipids?)	lipid/cell wall components	PM
SGL_RS10585	sll1374	2.A.2	GPH	The Glycoside-Pentoside-Hexuronide (GPH):Cation Symporter Family		melB	GPH-family multidrug transporter	multidrug	multidrug	PM			PM
SGL_RS16100	slr0798	3.A.3	P-ATPase	The P-type ATPase (P-ATPase) Superfamily		ziaA, slr0798	heavy metal transporting P-type ATPase	heavy metal	ion/metal	PM		PM	PM		slr0798
SGL_RS07030	sll1276	3.A.1	ABC	The ATP-binding Cassette (ABC) Superfamily	ABC+membrane	msbA	heterodimeric multidrug efflux ABC-transporter 1	multidrug	multidrug	PM		PM	PM
SGL_RS02045	slr1494	3.A.1	ABC	The ATP-binding Cassette (ABC) Superfamily	ABC+membrane			multidrug	multidrug	PM			Unknown
SGL_RS05640	slr1149	3.A.1	ABC	The ATP-binding Cassette (ABC) Superfamily	ABC+membrane		heterodimeric multidrug efflux ABC-transporter 2	multidrug	multidrug	PM		PM	PM		slr1149	most similar to PCC0921/PCC0227
SGL_RS15595	slr0615	3.A.1	ABC	The ATP-binding Cassette (ABC) Superfamily	ABC+membrane			multidrug	multidrug	PM		PM	PM			most similar to PCC0921/PCC0227
SGL_RS05425	slr2019	3.A.1	ABC	The ATP-binding Cassette (ABC) Superfamily	ABC+membrane		homodimeric lipid A ABC-exporter	unknown (lipidA?)	unknown	PM		PM	PM
SGL_RS16180	sll0778	3.A.1	ABC	The ATP-binding Cassette (ABC) Superfamily	ABC+membrane		homodimeric putative pigment export ABC-transporter	unknown	unknown	PM			PM
SGL_RS09360	slr1515	9.B.67	OAP	O-antigen Polymerase (OAP) Family		ictB	ictB (involved in bicarbonate uptake)	bicarbonate?	inorganic anion	PM		PM	PM			most similar to PCC0529
SGL_RS07135	slr0875	1.A.22	MscL	The Large Conductance Mechanosensitive Ion Channel (MscL) Family		mscL	ion channel MscL	ions	ion/metal	PM	TM, PM
SGL_RS15465	slr0510	1.A.23	MscS	The Small Conductance Mechanosensitive Ion Channel (MscS) Family			ion channel mscS	ions	ion/metal	PM		PM	PM			most similar to PCC0817
SGL_RS16395	slr0765	1.A.23	MscS	The Small Conductance Mechanosensitive Ion Channel (MscS) Family		mscS	ion channel mscS	ions	ion/metal	PM		PM	PM			most similar to PCC0817
SGL_RS15765	slr0109	1.A.23	MscS	The Small Conductance Mechanosensitive Ion Channel (MscS) Family			ion channel mscS	ions	ion/metal	PM			PM
SGL_RS14295	slr0639	1.A.23	MscS	The Small Conductance Mechanosensitive Ion Channel (MscS) Family			ion channel mscS	ions	ion/metal	PM			PM
SGL_RS00355	slr5078	1.A.2	IRK-C	The Inward Rectifier K+ Channel (IRK-C) Family			IRK-C type potassium channel	potassium	ion/metal	PM		PM
SGL_RS10355	sll1878	3.A.1	ABC	The ATP-binding Cassette (ABC) Superfamily	ABC	futC	iron ABC-transporter futA1A2BC	iron	ion/metal	PM	PM		PM	sll1878
SGL_RS03245	slr1295	3.A.1	ABC	The ATP-binding Cassette (ABC) Superfamily	substrate binding	futA1, sufA, sufA1, idiA, futA		iron	ion/metal	PM	TM, PM	PM	PM	slr1295	slr1295
SGL_RS12585	slr0327	3.A.1	ABC	The ATP-binding Cassette (ABC) Superfamily	membrane	futB, hitB		iron	ion/metal	PM			PM		slr0327
SGL_RS15495	slr0513	3.A.1	ABC	The ATP-binding Cassette (ABC) Superfamily	substrate binding	futA2, idiA, futA		iron	ion/metal	PM	PM	TM	Soluble	slr0513
SGL_RS09045	sll0237	3.A.1	ABC	The ATP-binding Cassette (ABC) Superfamily	substrate binding	sfuA	iron ABC-transporter sfuABC	iron	ion/metal	PM		TM	PM
SGL_RS09035	sll0240	3.A.1	ABC	The ATP-binding Cassette (ABC) Superfamily	ABC	sfuC		unknown	ion/metal	PM			PM
SGL_RS09040	sll0238	3.A.1	ABC	The ATP-binding Cassette (ABC) Superfamily	membrane	futB-like, sfuB		iron	ion/metal	PM
SGL_RS01945	slr1319	3.A.1	ABC	The ATP-binding Cassette (ABC) Superfamily	substrate binding	fecB	iron dicitrate ABC-transporter fecABCDE	iron	ion/metal	PM		PM	PM
SGL_RS01935	slr1317	3.A.1	ABC	The ATP-binding Cassette (ABC) Superfamily	membrane	fecD		iron	ion/metal	PM			PM
SGL_RS01940	slr1318	3.A.1	ABC	The ATP-binding Cassette (ABC) Superfamily	ABC	fecE		iron	ion/metal	PM			PM
SGL_RS01930	slr1316	3.A.1	ABC	The ATP-binding Cassette (ABC) Superfamily	membrane	fecC		iron	ion/metal	PM
SGL_RS16795	sll0493	2.A.38	Trk	The K+ Transporter (Trk) Family		ktrA	KtrABE potassium transporter	potassium	ion/metal	PM		PM	PM			most similar to PCC0666
SGL_RS09315	slr1509	2.A.38	Trk	The K+ Transporter (Trk) Family		ktrB, ntpJ		potassium	ion/metal	PM			PM			most similar to PCC0665
SGL_RS09310	slr1508	2.A.38	Trk	The K+ Transporter (Trk) Family		KtrE, dgdA		potassium	ion/metal	PM			Unknown	slr1508		most similar to PCC0715
SGL_RS00220	sll5049	2.A.66	MOP	The Multidrug/Oligosaccharidyl-lipid/Polysaccharide (MOP) Flippase Superfamily	PST		KtrABE potassium transporter	polysaccharide/lipopolysaccharide	lipid/cell wall components
SGL_RS13160	sll0752	3.A.1	ABC	The ATP-binding Cassette (ABC) Superfamily	substrate binding	tgd2, sll0752, sltB2	lipid ABC-transporter tgd123 (1)	Trigalactosyl diacyl glycerol (=lipid)	lipid/cell wall components	PM	PM	PM	PM
SGL_RS04315	sll1001	3.A.1	ABC	The ATP-binding Cassette (ABC) Superfamily	ABC	tgd3, sltC1		Trigalactosyl diacyl glycerol (=lipid)	lipid/cell wall components	PM		PM	PM
SGL_RS04215	slr1045	3.A.1	ABC	The ATP-binding Cassette (ABC) Superfamily	membrane	tgd1, sltA1		Trigalactosyl diacyl glycerol (=lipid)	lipid/cell wall components	PM		PM
SGL_RS02745	sll1041	3.A.1	ABC	The ATP-binding Cassette (ABC) Superfamily	ABC	tgd3, sltC2	lipid ABC-transporter tgd123 (2)	Trigalactosyl diacyl glycerol (=lipid)	lipid/cell wall components	PM		TM	PM
SGL_RS04310	sll1002	3.A.1	ABC	The ATP-binding Cassette (ABC) Superfamily	substrate binding	tgd2, ycf22, sltB1		Trigalactosyl diacyl glycerol (=lipid)	lipid/cell wall components	PM		PM	PM
SGL_RS10085	slr1344	3.A.1	ABC	The ATP-binding Cassette (ABC) Superfamily	membrane	tgd1, sltA2		Trigalactosyl diacyl glycerol (=lipid)	lipid/cell wall components	PM
SGL_RS14090	slr0488	2.A.66	MOP	The Multidrug/Oligosaccharidyl-lipid/Polysaccharide (MOP) Flippase Superfamily	MVF	murJ	lipid II flippase MurJ	peptidoglycan-lipid II	lipid/cell wall components	PM						most similar to PCC0513
SGL_RS09455	slr2107	3.A.1	ABC	The ATP-binding Cassette (ABC) Superfamily	membrane	(rfbA)	lipoplysaccharide ABC-exporter	O-antigen (=lipopolysaccharides) precursors	lipid/cell wall components	PM				slr2107
SGL_RS09460	slr2108	3.A.1	ABC	The ATP-binding Cassette (ABC) Superfamily	ABC			lipopolysaccharide	lipid/cell wall components	PM
SGL_RS03540	slr0982	3.A.1	ABC	The ATP-binding Cassette (ABC) Superfamily	ABC	(rfbB), slr0982	lipopolysaccharide ABC-exporter 2	lipopolysaccharides	lipid/cell wall components	PM		PM	PM
SGL_RS03520	slr0977	3.A.1	ABC	The ATP-binding Cassette (ABC) Superfamily	membrane	(rfbA)		lipopolysaccharides	lipid/cell wall components	PM		PM
SGL_RS18240	sll0575	3.A.1	ABC	The ATP-binding Cassette (ABC) Superfamily	ABC	rfbB, sll0575	lipopolysaccharide ABC-Exporter rfbAB	O-antigen (=lipopolysaccharides) precursors	lipid/cell wall components	PM		PM	PM
SGL_RS18245	sll0574	3.A.1	ABC	The ATP-binding Cassette (ABC) Superfamily	membrane	rfbA		lipopolysaccharides	lipid/cell wall components	PM		PM		sll0574
SGL_RS08850	slr1727	2.A.36	CPA1	The Monovalent Cation:Proton Antiporter-1 (CPA1) Family		nhaP, nhaS1	low-affinity sodium/proton antiporter NhaS1	cations	ion/metal	TM	TM	TM	TM	slr1727	slr1727
SGL_RS16695	sll0507	1.A.35	MIT	The CorA Metal Ion Transporter (MIT) Family		corA, rfrO	magnesium transporter CorA	magnesium	ion/metal	PM		PM	PM
SGL_RS16275	sll0671	1.A.35	MIT	The CorA Metal Ion Transporter (MIT) Family		corA, sll0671	magnesium transporter CorA	magnesium	ion/metal				Unknown		sll0671
SGL_RS06105	slr1216	9.A.19	MgtE	The Mg2+ Transporter-E (MgtE) Family		mgtE	magnesium transporter mgtE	magnesium	ion/metal	PM	PM	PM	PM			most similar to PCC0450
SGL_RS08820	sll1598	3.A.1	ABC	The ATP-binding Cassette (ABC) Superfamily	substrate binding	mntC	manganese ABC-transporter mntABC	manganese	ion/metal	PM
SGL_RS08815	sll1599	3.A.1	ABC	The ATP-binding Cassette (ABC) Superfamily	ABC	mntA		manganese	ion/metal	PM
SGL_RS08810	sll1600	3.A.1	ABC	The ATP-binding Cassette (ABC) Superfamily	membrane	mntB		manganese	ion/metal	PM
SGL_RS06455	slr1543	2.A.66	MOP	The Multidrug/Oligosaccharidyl-lipid/Polysaccharide (MOP) Flippase Superfamily	MATE		MATE-family multidrug efflux transporter	multidrug	multidrug	TM			TM
SGL_RS14765	slr0896	2.A.66	MOP	The Multidrug/Oligosaccharidyl-lipid/Polysaccharide (MOP) Flippase Superfamily	MATE		MATE-family multidrug efflux transporter	multidrug	multidrug
SGL_RS13045	sll0771	2.A.1	MFS	The Major Facilitator Superfamily (MFS)		glcP, gtr, tgr	MFS-family hexose transporter	hexose	sugar-(P)	PM		PM	PM
SGL_RS08385	sll1154	2.A.1	MFS	The Major Facilitator Superfamily (MFS)			MFS-family multidrug transporter	multidrug	multidrug						sll1154
SGL_RS01960	sll1204	2.A.1	MFS	The Major Facilitator Superfamily (MFS)			MFS-family multidrug transporter	multidrug	multidrug
SGL_RS12350	slr1935	2.A.1	MFS	The Major Facilitator Superfamily (MFS)			MFS-family multidrug transporter	multidrug	multidrug
SGL_RS08630	sll1906	2.A.1	MFS	The Major Facilitator Superfamily (MFS)		orf484	MFS-family pigment transporter	pigments	other				Unknown
SGL_RS03230	sll1200	2.A.1	MFS	The Major Facilitator Superfamily (MFS)			MFS-family transporter	unknown	unknown				Unknown
SGL_RS15600	slr0616	2.A.1	MFS	The Major Facilitator Superfamily (MFS)			MFS-family transporter	unknown	unknown
SGL_RS16340	slr0712	2.A.1	MFS	The Major Facilitator Superfamily (MFS)			MFS-family transporter	unknown	unknown
SGL_RS16430	sll0739	3.A.1	ABC	The ATP-binding Cassette (ABC) Superfamily	ABC+membrane	modBC	molybdate ABC-transporter modABC	molybdate	inorganic anion	PM			PM
SGL_RS16435	sll0738	3.A.1	ABC	The ATP-binding Cassette (ABC) Superfamily	substrate binding	modA		molybdate	inorganic anion	PM
SGL_RS15615	sll0590	1.A.23	MscS	The Small Conductance Mechanosensitive Ion Channel (MscS) Family			mscS-type channel	unknown	unknown	PM			PM
SGL_RS02750	sll1040	1.A.23	MscS	The Small Conductance Mechanosensitive Ion Channel (MscS) Family			mscS-type channel	unknown	unknown	PM			PM
SGL_RS04955	sll0985	1.A.23	MscS	The Small Conductance Mechanosensitive Ion Channel (MscS) Family		pamA	mscS-type channel for osmolytes	osmolytes	unknown	PM		PM	PM		sll0985
SGL_RS06320	sll1725	3.A.1	ABC	The ATP-binding Cassette (ABC) Superfamily	ABC+membrane		multidrug efflux ABC-transporter	multidrug	multidrug	PM			PM
SGL_RS13110	sll0759	3.A.1	ABC	The ATP-binding Cassette (ABC) Superfamily	ABC	cmrA, sll0759	multidrug efflux ABC-transporter	multidrug	multidrug	TM		TM	TM	sll0759		most similar to PCC0749
SGL_RS13105	sll0760	3.A.1	ABC	The ATP-binding Cassette (ABC) Superfamily	membrane	cmrB		multidrug	multidrug	TM						most similar to PCC0750
SGL_RS14915	slr0559	3.A.1	ABC	The ATP-binding Cassette (ABC) Superfamily	substrate binding	natB	neutral amino acid ABC-transporter natABCDE	neutral amino acids	amino acid	PM	TM, PM	PM	PM	slr0559	slr0559
SGL_RS12165	sll0146	3.A.1	ABC	The ATP-binding Cassette (ABC) Superfamily	membrane	natC		neutral amino acids	amino acid	PM		PM	PM
SGL_RS14000	slr0467	3.A.1	ABC	The ATP-binding Cassette (ABC) Superfamily	ABC	natA		neutral amino acids	amino acid	PM		PM	PM
SGL_RS07665	slr1881	3.A.1	ABC	The ATP-binding Cassette (ABC) Superfamily	ABC	natE		neutral amino acids	amino acid	PM			PM
SGL_RS11390	slr0949	3.A.1	ABC	The ATP-binding Cassette (ABC) Superfamily	membrane	natD		neutral amino acids	amino acid	PM
SGL_RS16060	slr0793	2.A.6	RND	The Resistance-Nodulation-Cell Division (RND) Superfamily	membrane fusion protein	nrsB	nickel efflux permease nrsAB + OM-pore nrsC	nickel	ion/metal	PM
SGL_RS16065	slr0794	2.A.6	RND	The Resistance-Nodulation-Cell Division (RND) Superfamily	HME	nrsA		nickel	ion/metal	PM
SGL_RS16075	slr0796	2.A.1	MFS	The Major Facilitator Superfamily (MFS)		nrsD	nickel efflux permease nrsD	nickel	ion/metal
SGL_RS06595	sll1450	3.A.1	ABC	The ATP-binding Cassette (ABC) Superfamily	substrate binding	nrtA	nitrate/nitrite ABC-transporter nrtABCD	nitrite/nitrate	inorganic anion	PM	TM, PM	PM	PM	sll1450	sll1450
SGL_RS06585	sll1452	3.A.1	ABC	The ATP-binding Cassette (ABC) Superfamily	ABC	nrtC		nitrite/nitrate	inorganic anion	PM		PM	PM	sll1452
SGL_RS06580	sll1453	3.A.1	ABC	The ATP-binding Cassette (ABC) Superfamily	ABC	nrtD		nitrite/nitrate	inorganic anion	PM		PM	PM	sll1453
SGL_RS06590	sll1451	3.A.1	ABC	The ATP-binding Cassette (ABC) Superfamily	membrane	nrtB, cmpB		nitrite/nitrate	inorganic anion	PM
SGL_RS08095	slr1740	3.A.1	ABC	The ATP-binding Cassette (ABC) Superfamily	substrate binding	appA	oligopeptide ABC-transporter appABCDF	peptide	other	PM	PM, TM	PM	PM		slr1740
SGL_RS13325	sll0312	3.A.1	ABC	The ATP-binding Cassette (ABC) Superfamily	membrane	appB		peptide	other	PM		PM	PM
SGL_RS07570	sll1768	3.A.1	ABC	The ATP-binding Cassette (ABC) Superfamily	membrane	appB		peptide	other	PM			PM
SGL_RS12560	slr0324	3.A.1	ABC	The ATP-binding Cassette (ABC) Superfamily	membrane	appC		peptide	other	PM			Unknown
SGL_RS07890	sll1699	3.A.1	ABC	The ATP-binding Cassette (ABC) Superfamily	substrate binding	appA	oligosaccharide ABC-transporter appABCDF	oligosaccharide	sugar-(P)	PM	PM	PM	PM
SGL_RS15105	sll0833	3.A.1	ABC	The ATP-binding Cassette (ABC) Superfamily	membrane	appC		oligosaccharide	sugar-(P)	PM		PM	PM		sll0833
SGL_RS14200	sll0680	3.A.1	ABC	The ATP-binding Cassette (ABC) Superfamily	substrate binding	pstS, phoS, pstS1, pstB	phosphate ABC-transporter pstABCS	phosphate	inorganic anion	PM	PM	PM	PM	sll0680	sll0680	most similar to PCC0395
SGL_RS14185	sll0683	3.A.1	ABC	The ATP-binding Cassette (ABC) Superfamily	ABC	phoT, pstB, pstB1		phosphate	inorganic anion	PM		PM	PM			most similar to PCC0163
SGL_RS14180	sll0684	3.A.1	ABC	The ATP-binding Cassette (ABC) Superfamily	ABC	phoT, pstB, pstB1'		phosphate	inorganic anion	PM			PM			most similar to PCC0163
SGL_RS08405	slr1250	3.A.1	ABC	The ATP-binding Cassette (ABC) Superfamily	ABC	phoT, pstB, pstB2		phosphate	inorganic anion	PM			PM
SGL_RS08390	slr1247	3.A.1	ABC	The ATP-binding Cassette (ABC) Superfamily	substrate binding	pstS, phoS, pstS2		phosphate	inorganic anion	PM		TM	Unknown	slr1247		most similar to PCC0395
SGL_RS14195	sll0681	3.A.1	ABC	The ATP-binding Cassette (ABC) Superfamily	membrane	pstC		phosphate	inorganic anion	PM						most similar to PCC0161
SGL_RS14190	sll0682	3.A.1	ABC	The ATP-binding Cassette (ABC) Superfamily	membrane	pstA		phosphate	inorganic anion	PM						most similar to PCC0162
SGL_RS08395	slr1248	3.A.1	ABC	The ATP-binding Cassette (ABC) Superfamily	membrane	pstC		phosphate	inorganic anion	PM
SGL_RS08400	slr1249	3.A.1	ABC	The ATP-binding Cassette (ABC) Superfamily	membrane	pstA, phoT		phosphate	inorganic anion	PM
SGL_RS17505	slr1575	1.A.23	MscS	The Small Conductance Mechanosensitive Ion Channel (MscS) Family		kef, kchX	potassium channel mscS	potassium	ion/metal	PM		PM	PM
SGL_RS08870	slr1729	3.A.3	P-ATPase	The P-type ATPase (P-ATPase) Superfamily		kdpB	potassium P-type ATPase kdpABCD	potassium	ion/metal	PM		TM	PM
SGL_RS08865	slr1728	3.A.3	P-ATPase	The P-type ATPase (P-ATPase) Superfamily		kdpA		potassium	ion/metal	PM		PM	PM
SGL_RS08885	slr1731	3.A.3	P-ATPase	The P-type ATPase (P-ATPase) Superfamily		kdpD		potassium	ion/metal	PM			PM
SGL_RS08880	slr1730	3.A.3	P-ATPase	The P-type ATPase (P-ATPase) Superfamily		kdpC		potassium	ion/metal	PM
SGL_RS04025	slr1596	9.B.73	CemA	Chloroplast Envelope/Cyanobacterial Membrane Protein (CemA) Family		pxcA, cotA	proton extrusion protein pxcA	protons	ion/metal	PM		PM	PM			most similar to PCC0044
SGL_RS17195	slr1462	9.A.8	FeoB	The Ferrous Iron Uptake (FeoB) Family			putative feoB-type iron transporter	iron?	ion/metal	PM		PM	PM		slr1462
SGL_RS04050	sll1513	9.B.14.	HHP	The Heme Handling Protein (HHP) Family		ycf5, ccsA	putative HHP-family heme transporter	heme	other	TM		TM	TM	sll1513		most similar to PCC0266
SGL_RS03915	slr0686	9.B.210	DUF4780	The DUF4870 (DUF4780) Family			putative permease	unknown	unknown
SGL_RS14625	ssl0353	9.A.4	YggT	The YggT or Fanciful K+ Uptake-B (FkuB; YggT) Family			putative potassium uptake transporter YggT	potassium?	ion/metal ?							most similar to PCC0175/PCC0672
SGL_RS03240	ssr2142	9.A.4	YggT	The YggT or Fanciful K+ Uptake-B (FkuB; YggT) Family			putative potassium uptake transporter YggT	potassium?	ion/metal ?							most similar to PCC0175/PCC0672
SGL_RS04705	sll1929	3.A.11	DNA-T	The Bacterial Competence-related DNA Transformation Transporter (DNA-T) Family	permease component	comEC	putative ssDNA uptake system	DNA	other	PM			PM
SGL_RS14595	slr0197	3.A.11	DNA-T	The Bacterial Competence-related DNA Transformation Transporter (DNA-T) Family	binding component	comA, comEA		DNA	other	PM		PM	Unknown
SGL_RS09250	sll1428	2.A.28	BASS	The Bile Acid:Na+ Symporter (BASS) Family			sodium ion/bile acid transporter	bile acid	other
SGL_RS09335	slr1512	2.A.83	SBT	The Na+-dependent Bicarbonate Transporter (SBT) Family		sbtA, slr1512	sodium/bicarbonate symporter sbtA	bicarbonate	inorganic anion	PM	TM, PM	TM	PM		slr1512
SGL_RS15670	slr0625	2.A.27	ESS	The Glutamate:Na+ Symporter (ESS) Family		gltS, slr0625	sodium/glutamate symporter	glutamate	amino acid	PM		PM	PM
SGL_RS05620	slr1145	2.A.27	ESS	The Glutamate:Na+ Symporter (ESS) Family		gltS	sodium/glutamate symporter	glutamate	amino acid
SGL_RS11825	sll0273	2.A.36	CPA1	The Monovalent Cation:Proton Antiporter-1 (CPA1) Family		nhaS2, nhaP2	sodium/proton antiporter NhaS2	cations	ion/metal	PM			PM
SGL_RS14155	sll0689	2.A.37	CPA2	The Monovalent Cation:Proton Antiporter-2 (CPA2) Family		nhaS3, napA1	sodium/proton antiporter NhaS3	cations	ion/metal	TM	TM	TM	TM	sll0689		most similar to PCC0474
SGL_RS04015	slr1595	2.A.37	CPA2	The Monovalent Cation:Proton Antiporter-2 (CPA2) Family		nhaS4	sodium/proton antiporter NhaS4	cations	ion/metal
SGL_RS14400	slr0415	2.A.37	CPA2	The Monovalent Cation:Proton Antiporter-2 (CPA2) Family		nhaS5	sodium/proton antiporter NhaS5	cations	ion/metal	PM		PM	PM
SGL_RS14920	sll0556	2.A.36	CPA1	The Monovalent Cation:Proton Antiporter-1 (CPA1) Family		nhaS6	sodium/proton antiporter NhaS6	cations	ion/metal	TM		TM	TM
SGL_RS11060	sll1087	2.A.21	SSS	The Solute:Sodium Symporter (SSS) Family		nanT/P	SSS-type sialic acid transporter	sialic acid	other	PM	PM	PM	PM
SGL_RS06675	slr1224	3.A.1	ABC	The ATP-binding Cassette (ABC) Superfamily	ABC	lacK, malK	sugar ABC-transporter	fructooligosaccharide MsmEFGK	sugar-(P)	PM	PM	PM	PM
SGL_RS08790	slr1723	3.A.1	ABC	The ATP-binding Cassette (ABC) Superfamily	membrane	lacG, msmG		fructooligosaccharide MsmEFGK	sugar-(P)	PM			PM
SGL_RS06020	slr1202	3.A.1	ABC	The ATP-binding Cassette (ABC) Superfamily	membrane	lacF, msmF		fructooligosaccharide MsmEFGK (Barrangou et al., 2003)	sugar-(P)	PM			Unknown
SGL_RS05565	sll1082	3.A.1	ABC	The ATP-binding Cassette (ABC) Superfamily	ABC	tauB	sulfonate ABC-transporter	nitrite/nitrate	unknown	PM			PM
SGL_RS05570	sll1081	3.A.1	ABC	The ATP-binding Cassette (ABC) Superfamily	membrane	tauC		sulfonate	unknown	PM
SGL_RS17140	slr1452	3.A.1	ABC	The ATP-binding Cassette (ABC) Superfamily	substrate binding	sbpA	sulfate ABC-transporter	sulfate	inorganic anion	PM	PM	PM	PM
SGL_RS17150	slr1453	3.A.1	ABC	The ATP-binding Cassette (ABC) Superfamily	membrane	cysT		sulfate	inorganic anion	PM
SGL_RS17155	slr1454	3.A.1	ABC	The ATP-binding Cassette (ABC) Superfamily	membrane	cysW		sulfate	inorganic anion	PM
SGL_RS17160	slr1455	3.A.1	ABC	The ATP-binding Cassette (ABC) Superfamily	ABC	cysA		sulfate	inorganic anion	PM
SGL_RS02930	slr1776	2.A.53	SulP	The Sulfate Permease (SulP) Family		sulP	sulP-family sulfate transporter	sulfate	inorganic anion	PM		PM	PM
SGL_RS06705	slr1229	2.A.53	SulP	The Sulfate Permease (SulP) Family			sulP-family sulfate transporter	sulfate	inorganic anion					slr1229
SGL_RS05900	slr1901	3.A.1	ABC	The ATP-binding Cassette (ABC) Superfamily	ABC	evrA	The ethyl (methyl; benzyl) viologen export pump, EvrABC (Prosecka et al., 2009)	ethyl (methyl; benzyl) viologen	other	PM		PM	PM
SGL_RS18385	slr0610	3.A.1	ABC	The ATP-binding Cassette (ABC) Superfamily	membrane	evrC		ethyl (methyl; benzyl) viologen	other	PM
SGL_RS11075	slr1174	3.A.1	ABC	The ATP-binding Cassette (ABC) Superfamily	membrane	evrB		ethyl (methyl; benzyl) viologen	other	PM
SGL_RS10630	sll1180	3.A.1	ABC	The ATP-binding Cassette (ABC) Superfamily	ABC+membrane	hlyB	toxin secretion ABC-transporter hlyBD+ OM pore tolC	peptide	multidrug	PM	PM	PM	PM
SGL_RS17795	slr1651	3.A.1	ABC	The ATP-binding Cassette (ABC) Superfamily	ABC+membrane	hlyB		peptide	multidrug	PM		PM	PM
SGL_RS03450	sll0932	2.A.119	ArsP	The Organo-Arsenical Exporter (ArsP) Family	membrane		uncharacterized permease	unknown	unknown	PM	TM		PM
SGL_RS14500	sll0374	3.A.1	ABC	The ATP-binding Cassette (ABC) Superfamily	ABC	livG, urtE, braG, livF, livFH	urea ABC-transporter urtABCDE	urea	other	PM	PM	PM	PM	sll0374
SGL_RS11810	slr0447	3.A.1	ABC	The ATP-binding Cassette (ABC) Superfamily	substrate binding	urtA, amiC, slr0447		urea	other	PM	TM, PM	PM	PM	slr0447	slr0447
SGL_RS06015	slr1201	3.A.1	ABC	The ATP-binding Cassette (ABC) Superfamily	membrane	urtC, livM, slr1201		urea	other	PM		TM	PM
SGL_RS13090	sll0764	3.A.1	ABC	The ATP-binding Cassette (ABC) Superfamily	ABC	urtD, livG		urea	other	PM		PM	PM
SGL_RS06010	slr1200	3.A.1	ABC	The ATP-binding Cassette (ABC) Superfamily	membrane	urtB, livH, slr1200		urea	other	PM			PM
SGL_RS18275	slr0593	1.A.1	VIC	The Voltage-gated Ion Channel (VIC) Superfamily			VIC-type cation channel	2+ cations	ion/metal	PM		PM
SGL_RS04870	sll0993	1.A.1	VIC	The Voltage-gated Ion Channel (VIC) Superfamily		kef, kchX	VIC-type potassium channel	potassium	ion/metal	PM		PM	PM
SGL_RS16900	sll0536	1.A.1	VIC	The Voltage-gated Ion Channel (VIC) Superfamily		kef	VIC-type potassium channel	potassium	ion/metal
SGL_RS15385	slr0498	1.A.1	VIC	The Voltage-gated Ion Channel (VIC) Superfamily		synK	VIC-type potassium channel	potassium	ion/metal
SGL_RS04620	slr2043	3.A.1	ABC	The ATP-binding Cassette (ABC) Superfamily	substrate binding	znuA	zinc/cation ABC-transporter	zinc	ion/metal	PM		PM	PM
SGL_RS04625	slr2044	3.A.1	ABC	The ATP-binding Cassette (ABC) Superfamily	ABC			2+ cations	ion/metal	PM
SGL_RS04630	slr2045	3.A.1	ABC	The ATP-binding Cassette (ABC) Superfamily	membrane			2+ cations	ion/metal	PM
SGL_RS05330	sll1927	3.A.1	ABC	The ATP-binding Cassette (ABC) Superfamily	ABC	oppF, appD, appF	ABC-transporter ABC-component	unknown, maybe oligopeptide	unknown	PM		PM	PM
SGL_RS02120	slr1113	3.A.1	ABC	The ATP-binding Cassette (ABC) Superfamily	ABC	slr1113	ABC-transporter ABC-component	unknown	unknown	PM		PM	PM
SGL_RS16750	slr0544	3.A.1	ABC	The ATP-binding Cassette (ABC) Superfamily	ABC	macB-like?	ABC-transporter ABC-component	unknown	unknown
SGL_RS11655	slr1647	3.A.1	ABC	The ATP-binding Cassette (ABC) Superfamily	membrane		ABC-transporter permease-component	unknown	unknown				Unknown
SGL_RS12030	slr0401	3.A.1	ABC	The ATP-binding Cassette (ABC) Superfamily		potD, slr0401	ABC-transporter substrate binding protein	spermidine	other	PM		PM	PM		slr0401
SGL_RS12730	sll0174	3.A.1	ABC	The ATP-binding Cassette (ABC) Superfamily	substrate binding		amino acid ABC-transporter substrate binding component	glutamine/glutamate/aspartate	amino acid	PM		PM	Soluble
SGL_RS14325	sll0606	3.A.1	ABC	The ATP-binding Cassette (ABC) Superfamily	sunstrate binding		branached chain amino acids ABC-transporter substrate binding component	branched chain amino acids	amino acid	PM		PM	PM		sll0606
SGL_RS07340	sll1314	2.A.56	TRAP-T	The Tripartite ATP-independent Periplasmic Transporter (TRAP-T) Family		dctP	dicarboxylate transporter, solute binding component	dicarboxylate	carboxylates	TM		TM	Soluble	sll1314
SGL_RS02570	sll0224	3.A.1	ABC	The ATP-binding Cassette (ABC) Superfamily	substrate binding	gltI	glutamate binding protein	glutamate	amino acid	PM		PM	Soluble	sll0224
SGL_RS07630	sll1762	3.A.1	ABC	The ATP-binding Cassette (ABC) Superfamily	substrate binding	gltI	glutamate binding protein	glutamate	amino acid	PM		PM	Soluble	sll1762
SGL_RS13190	slr0341	3.A.1	ABC	The ATP-binding Cassette (ABC) Superfamily	substrate binding	gltI	glutamate binding protein	glutamate	amino acid	PM		PM	Unknown		slr0341
SGL_RS13890	sll0064	3.A.1	ABC	The ATP-binding Cassette (ABC) Superfamily	substrate binding	gltI	glutamate binding protein	glutamate	amino acid	TM		TM	Soluble
SGL_RS03385	slr0964	9.A.10	ILT	The Iron/Lead Transporter (ILT) Superfamily		slr0964	ILT-family iron transporter component	iron	ion/metal	TM			TM
SGL_RS02035	slr1492	3.A.1	ABC	The ATP-binding Cassette (ABC) Superfamily	substrate binding	fecB-like	iron ABC-transporter substrate binding protein	iron	ion/metal	PM		PM	PM
SGL_RS01970	sll1202	3.A.1	ABC	The ATP-binding Cassette (ABC) Superfamily	substrate binding	fecB-like	iron ABC-transporter substrate binding protein	iron	ion/metal	PM			PM
SGL_RS02030	slr1491	3.A.1	ABC	The ATP-binding Cassette (ABC) Superfamily	substrate binding	fecB-like	iron ABC-transporter substrate binding protein	iron	ion/metal
SGL_RS02590	slr0251	3.A.1	ABC	The ATP-binding Cassette (ABC) Superfamily	ABC	lptB, ycf85	lipopolysaccharide ABC-transporter lptABF+OM pore lptD, ABC-component	lipopolysaccharides	lipid/cell wall components	PM	PM	PM	PM
SGL_RS10420	sll1870	3.A.1	ABC	The ATP-binding Cassette (ABC) Superfamily	ABC	metN	methionine ABC-transporter metQNI	methionine	amino acid	PM		PM	PM
SGL_RS10220	slr1962	2.A.56	TRAP-T	The Tripartite ATP-independent Periplasmic Transporter (TRAP-T) Family		dctP	monocarboxylate transporter, solute binding component	monocarboxylate	carboxylate	PM	PM, TM	PM	PM	slr1962	slr1962
SGL_RS15060	sll0540	3.A.1	ABC	The ATP-binding Cassette (ABC) Superfamily	substrate binding	sll0540, pstS	phosphate ABC-transporter substrate binding component	phosphate	inorganic anion	PM	PM	PM	PM
SGL_RS14205	sll0679	3.A.1	ABC	The ATP-binding Cassette (ABC) Superfamily	substrate binding	sphX, pstS	phosphate ABC-transporter substrate binding component	phosphate	inorganic anion	PM		TM	PM
SGL_RS13035	slr0773	2.A.38	Trk	The K+ Transporter (Trk) Family		trkA	potassium permease system component	potassium	ion/metal	PM		PM	Soluble
SGL_RS08805	ssl3127	3.A.1	ABC	The ATP-binding Cassette (ABC) Superfamily	membrane		protein fragment of natC?	branched chain amino acids	amino acid
SGL_RS15270	sll0086	3.A.4	ArsAB	The Arsenite-Antimonite (ArsAB) Efflux Family		arsA	putative arsenical pump-driving ATPase	arsenite	ion/metal	PM		PM	Soluble
SGL_RS18035	slr0454	2.A.6	RND	The Resistance-Nodulation-Cell Division (RND) Superfamily	HAE1	nolG, acrB	RND-family lipopolysaccharide transporter	lipopolysaccharides	lipid/cell wall components	PM		PM	PM		slr0454
SGL_RS12895	slr0369	2.A.6	RND	The Resistance-Nodulation-Cell Division (RND) Superfamily	HAE1	envD	RND-family multidrug transporter	multidrug	multidrug	PM	PM	PM	PM
SGL_RS09605	slr2131	2.A.6	RND	The Resistance-Nodulation-Cell Division (RND) Superfamily	HAE1	acrF	RND-family multidrug transporter	multidrug	multidrug	PM	PM	PM	PM
SGL_RS12200	sll0142	2.A.6	RND	The Resistance-Nodulation-Cell Division (RND) Superfamily	HAE1	sll0142, nolG	RND-family oligsaccharide transporter	oligosaccharides (nodulation factors)	sugar-(P)	PM		PM	PM
SGL_RS05880	slr1897	3.A.1	ABC	The ATP-binding Cassette (ABC) Superfamily	substrate binding	srrA	sugar ABC-transporter substrate binding component	sugar	sugar-(P)	PM	TM	PM	PM		slr1897
SGL_RS07475	slr1865	3.A.1	ABC	The ATP-binding Cassette (ABC) Superfamily	substrate binding		sugar ABC-transporter substrate binding component	carbohydrate	sugar-(P)	PM		PM	PM
SGL_RS15515	sll0473	3.A.1	ABC	The ATP-binding Cassette (ABC) Superfamily	substrate binding		sulfonate ABC-transporter substrate binding component	sulfonate	inorganic anion
SGL_RS18380	slr0609	2.A.5	ZIP	The Zinc (Zn2+)-Iron (Fe2+) Permease (ZIP) Family		yciC	zinc permease yciABC	zinc	ion/metal	TM		TM	Unknown
SGL_RS18285	slr0594	3.A.1	ABC	The ATP-binding Cassette (ABC) Superfamily	membrane	macB	multidrug efflux system macAB + OM pore	multidrug	multidrug	PM		PM	PM
SGL_RS02015	slr1488	3.A.1	ABC	The ATP-binding Cassette (ABC) Superfamily	ABC+membrane	slr1488	multidrug efflux ABC-transporter	multidrug	multidrug	PM			PM

## Sheet: Arabidopsis chloroplast (NE)
Table S2: The table lists transporters and transport systems for ions and metabolites that could be identified in the Arabidopsis thaliana nuclear genome and putatively localize to plastids.
The list contains nuclear encoded Arabidopsis transporters or transport systems downloaded from TransportDB 2.0 (status January 2020; Elbourne et al. 2017), classified according to the Transporter Classification Database (TCDB, Saier et al. 2016), and curated manually. The TCDB-Number, abbreviated and full family name, as well as common protein name are provided. For proteins that contribute to m…
ID	#TCDB	Transporter Family	Transporter Family	Subfamily/Subunit	Protein	Transporter/Transport system	Putative substrate	Substrate group (Fig.1)	Putative localization	plastid localization predicted by SUBAcon or TargetP (SUBA4)	plastid localization experimentally inferred (SUBA4)	envelope localization experimentally inferred (SUBA4)	Bouchnak et al. 2019 (inferred localization)	Bouchnak et al. 2019 (found in Chloroplast Envelopes)	Bräutigam et al. 2008 (found in Chloroplast Envelopes)	Simm et al. 2013 (found in Chloroplast Envelopes)	AT_CHLORO found in envelope (Ferro et al. 2010)	thylakoid localization experimentally inferred (SUBA4)	Pfeil 2014	Comment/Literature
At2g28900	1.B.30	OEP16	The Plastid Outer Envelope Porin of 16 kDa (OEP16) Family		OEP16.1	amino acid export outer envelope protein 16	Export of amino acids and amines	amino acid	OE		yes	yes	OE	yes	yes	yes	yes	TM		Breuers et al. 2011
At4g16160	1.B.30	OEP16	The Plastid Outer Envelope Porin of 16 kDa (OEP16) Family		OEP16.2	amino acid export outer envelope protein 16	Export of amino acids and amines	amino acid	OE	yes	yes					yes				Breuers et al. 2011
At3g62880	1.B.30	OEP16	The Plastid Outer Envelope Porin of 16 kDa (OEP16) Family		OEP16.4	amino acid export outer envelope protein 16	Export of amino acids and amines	amino acid	OE	yes	yes									Breuers et al. 2011
At1g20816	1.B.29	OEP21	The Plastid Outer Envelope Porin of 21 kDa (OEP21) Family	beta-barrel pore	OEP21.1	carboxylate transport outer envelope protein 21	Phosphorylated carboxylates,Pi, rectifiying	carboxylate	OE	yes	yes	yes	OE	yes		yes	yes			Breuers et al. 2011
At1g76405	1.B.29	OEP21	The Plastid Outer Envelope Porin of 21 kDa (OEP21) Family	beta-barrel pore	OEP21.2	carboxylate transport outer envelope protein 21	Phosphorylated carboxylates,Pi, rectifiying	carboxylate	OE	yes	yes	yes	OE	yes	yes	yes	yes			Breuers et al. 2011
At2g17695	1.B.77	Oep23	The Chloroplast Outer Membrane Porin (Oep23) Family	beta-barrel pore	OEP23	cation transport outer envelope protein 23	cations	ion/metal	OE	yes	yes	yes	OE	yes	yes		yes			Goetze et al. 2015
At3g06960	1.B.82	TGD4	The Chloroplast Trigalactosyldiacylglycerol-4 Porin (TGD4) Family.	beta-barrel pore	TGD4	glycerolipid transporter OM-component, works with ABC-transporter TGD123	Glycerolipids	lipid/cell wall components	OE	yes	yes	yes	OE	yes			yes			Wang et al. 2013
At5g42960	1.B.28	OEP24	The Plastid Outer Envelope Porin of 24 kDa (OEP24) Family	beta-barrel pore	OEP24	solute transport outer envelope protein 24	TP,hexose-phosphates,sugar, dicarboxylates,charged amino acids, ATP,Pi	other	OE	yes	yes	yes	OE	yes	yes		yes			Breuers et al. 2011
At1g45170	1.B.28	OEP24	The Plastid Outer Envelope Porin of 24 kDa (OEP24) Family	beta-barrel pore	OEP24	solute transport outer envelope protein 24	TP,hexose-phosphates,sugar, dicarboxylates,charged amino acids, ATP,Pi	other	OE		yes		OE	yes		yes				Breuers et al. 2011
At2g43950	1.B.47	OEP37	The Plastid Outer Envelope Porin of 37 kDa (OEP37) Family	beta-barrel pore	OEP37	solute transport outer envelope protein 37	peptides, cations, rectifying	other	OE	yes	yes	yes	OE	yes	yes	yes	yes			Breuers et al. 2011
At3g57990		OEP40	no TCDB entry yet?	beta-barrel pore	OEP40	sugar-(P) transport outer envelope protein 40	glucose, Glc-1-P, Glc-6-P	sugar-(P)	OE											Harsman et al. 2016
At2g01320	3.A.1	ABC	The ATP-binding Cassette (ABC) Superfamily	ABCG(WHITE)		ABC2-type homodimeric ABC-transporter	unknown	unknown	E	yes	yes	yes		yes	yes	yes	yes
At4g32400	2.A.29	MC	The Mitochondrial Carrier (MC) Family		BT1	Adenine nucleotide carrier	Adenine nucleotide (ATP, ADP)	nucleotide	E	yes	yes	yes	IE	yes	yes		yes
At2g29650	2.A.1	MFS	The Major Facilitator Superfamily (MFS)		ANTr1/PHT4;1	ANTr1/PHT4;1 anion MFS-transporter	phosphate/ascorbate	inorganic anion	E	yes	yes	yes	IE	yes			yes		TM
At2g36830	1.A.8	MIP	The Major Intrinsic Protein (MIP) Family			aquaporin	water	other	E		yes	yes		yes			yes
At4g35100	1.A.8	MIP	The Major Intrinsic Protein (MIP) Family			aquaporin	water	other	E		yes	yes		yes			yes
At3g53420	1.A.8	MIP	The Major Intrinsic Protein (MIP) Family			aquaporin	H2O2	other	E		yes	yes		yes
At2g45960	1.A.8	MIP	The Major Intrinsic Protein (MIP) Family			aquaporin	water	other	E		yes			yes			yes
At1g01620	1.A.8	MIP	The Major Intrinsic Protein (MIP) Family		PIP1	aquaporin	water	other	E		yes	yes					yes
At5g60660	1.A.8	MIP	The Major Intrinsic Protein (MIP) Family		PIP2	aquaporin	water	other	E		yes	yes					yes
At2g37170	1.A.8	MIP	The Major Intrinsic Protein (MIP) Family			aquaporin	H2O2	other	E		yes	yes				yes
At2g37180	1.A.8	MIP	The Major Intrinsic Protein (MIP) Family			aquaporin	H2O2	other	E		yes	yes
At1g78180	2.A.29	MC	The Mitochondrial Carrier (MC) Family			ATP carrier	ATP/magnesium/phosphate	nucleotide	E	yes	yes	yes	IE	yes			yes
At3g51870	2.A.29	MC	The Mitochondrial Carrier (MC) Family		TAAC	ATP/ADP antiporter	ATP/ADP	nucleotide	E	yes	yes	yes	IE	yes			yes
At1g15500	2.A.12	AAA	The ATP:ADP Antiporter (AAA) Family		NTT2	ATP:ADP antiporter	ATP/ADP	nucleotide	E	yes	yes	yes	IE	yes			yes
At1g80300	2.A.12	AAA	The ATP:ADP Antiporter (AAA) Family		NTT1	ATP:ADP antiporter	ATP/ADP	nucleotide	E	yes	yes	yes	IE	yes	yes	yes	yes
At1g35720	1.A.31	Annexin	The Annexin (Annexin) Family		ANNAT1	calcium channel forming	calcium	ion/metal	E		yes		(E)	yes
At4g24460	2.A.7	DMT	The Drug/Metabolite Transporter (DMT) Superfamily		CLT2	CLT2 glutathione transporter	glutathione	other	E	yes	yes	yes	IE	yes			yes
At5g12170	2.A.7	DMT	The Drug/Metabolite Transporter (DMT) Superfamily	PfCRT	CLT3	CLT3 glutathione transporter	glutathione	other	E	yes			IE	yes
At5g59250	2.A.1	MFS	The Major Facilitator Superfamily (MFS)			D-xylose/proton symporter	xylose	sugar-(P)	E	yes	yes	yes	IE	yes	yes	yes	yes
At2g32040	2.A.71	FBT	The Folate-Biopterin Transporter (FBT) Family		FT	FT Folate transporter	folate	other	E	yes	yes	yes
At5g54800	2.A.7	DMT	The Drug/Metabolite Transporter (DMT) Superfamily		GPT1	GPT1 Glucose-6-P/phosphate antiporter	Glucose-6-P	sugar-(P)	E	yes	yes		IE	yes
At1g15690	3.A.10	H+-PPase	The H+-translocating Pyrophosphatase (H+-PPase) Family			H+-translocating Pyrophosphatase	protons	ion/metal	E		yes	yes		yes			yes
At3g21580	3.A.1	ABC	The ATP-binding Cassette (ABC) Superfamily	membrane	ABCI12	heavy metal uptake ABC-transporter	heavy metal ions	ion/metal	E	yes	yes	yes	IE	yes			yes
At4g33460	3.A.1	ABC	The ATP-binding Cassette (ABC) Superfamily	ABC	ABCI10		heavy metal ions	ion/metal	E	yes	yes	yes	IE	yes	yes		yes
At4g37270	3.A.3	P-ATPase	The P-type ATPase (P-ATPase) Superfamily		HMA1	HMA1 Heavy metal P-type ATPase	heavy metal ions	ion/metal	E	yes	yes	yes	IE	yes			yes
At5g58270	3.A.1	ABC	The ATP-binding Cassette (ABC) Superfamily	ABCB(HMT) ABC+membrane		homodimeric iron ABC-transporter	iron, metal ions, cPMP	ion/metal	E		yes	yes	IE	yes	yes		yes
At1g70610	3.A.1	ABC	The ATP-binding Cassette (ABC) Superfamily	ABCB(TAP) ABC+membrane		homodimeric multidrug efflux ABC-transporter	multidrug	multidrug	E	yes	yes	yes	IE	yes	yes		yes
At4g25450	3.A.1	ABC	The ATP-binding Cassette (ABC) Superfamily	ABCB(TAP) ABC+membrane		homodimeric multidrug efflux ABC-transporter	multidrug	multidrug	E	yes	yes	yes	IE	yes	yes	yes	yes
At5g03910	3.A.1	ABC	The ATP-binding Cassette (ABC) Superfamily	ABCB(LLP) ABC+membrane		homodimeric multidrug efflux ABC-transporter	unknown	unknown	E	yes	yes	yes	IE	yes			yes
At4g00290	1.A.23	MscS	The Small Conductance Mechanosensitive Ion Channel (MscS) Family			ion channel	ions	ion/metal	E		yes	yes	IE	yes			yes
At1g19800	3.A.1	ABC	The ATP-binding Cassette (ABC) Superfamily	membrane	TGD1	lipid ABC-transporter TGD123	Trigalactosyl diacyl glycerol (lipids)	lipid/cell wall components	E	yes	yes	yes	IE	yes			yes
At1g65410	3.A.1	ABC	The ATP-binding Cassette (ABC) Superfamily	ABC	TGD3		Trigalactosyl diacyl glycerol (lipids)	lipid/cell wall components	E	yes	yes	yes	IE	yes			yes
At3g20320	3.A.1	ABC	The ATP-binding Cassette (ABC) Superfamily	substrate	TGD2		Trigalactosyl diacyl glycerol (lipids)	lipid/cell wall components	E	yes	yes	yes	IE	yes	yes	yes	yes
At5g22830	1.A.35	MIT	The CorA Metal Ion Transporter (MIT) Family		MGT10	Magnesium transporter (CorA-like)	magnesium	ion/metal	E	yes	yes	yes	IE	yes			yes
At5g17520	2.A.84	MEX	The Chloroplast Maltose Exporter (MEX) Family		Mex1	Mex1 Maltose exporter	maltose	sugar-(P)	E	yes	yes	yes	IE	yes	yes	yes	yes
At5g10490	1.A.23	MscS	The Small Conductance Mechanosensitive Ion Channel (MscS) Family		MSL2	MscS-like ion channel	ions	ion/metal	E	yes	yes	yes	IE	yes			yes
At1g58200	1.A.23	MscS	The Small Conductance Mechanosensitive Ion Channel (MscS) Family		MSL3	MscS-like ion channel	ions	ion/metal	E	yes	yes	yes					yes
At5g03555	2.A.39	NCS1	The Nucleobase:Cation Symporter-1 (NCS1) Family		NCS1, PLUTO	nucleobase:proton symporter	Uracil, adenine, guanine	other	E	yes	yes	yes
At4g33520	3.A.3	P-ATPase	The P-type ATPase (P-ATPase) Superfamily		HMA6/PAA1	PAA1 Copper uptake P-type ATPase	copper	ion/metal	E	yes	yes	yes	IE	yes	yes		yes
At5g16150	2.A.1	MFS	The Major Facilitator Superfamily (MFS)		pGlcT	pGlcT Plastid Glucose transporter	glucose	sugar-(P)	E	yes	yes	yes	IE	yes	yes		yes
At3g26570	2.A.20	PiT	The Inorganic Phosphate Transporter (PiT) Family		PHT2.1	PHT2.1 Phosphate transporter	phosphate	inorganic anion	E	yes	yes	yes	IE	yes			yes
At2g38060	2.A.1	MFS	The Major Facilitator Superfamily (MFS)		PHT4.2	PHT4.2 ascorbate transporter	ascorbate	other	E	yes	yes	yes
At3g46980	2.A.1	MFS	The Major Facilitator Superfamily (MFS)		PHT4.3	PHT4.3 ascorbate transporter	ascorbate	other	E	yes	yes	yes	IE	yes			yes
At4g00370	2.A.1	MFS	The Major Facilitator Superfamily (MFS)		PHT4.4	PHT4.4 ascorbate transporter	ascorbate	other	E	yes	yes	yes	IE	yes	yes		yes
At3g56160	2.A.28	BASS	The Bile Acid:Na+ Symporter (BASS) Family		BASS4	Probable sodium/metabolite cotransporter	unknown	unknown	E	yes	yes	yes	IE	yes	yes		yes
At1g01790	2.A.37	CPA2	The Monovalent Cation:Proton Antiporter-2 (CPA2) Family		KEA1	proton/potassium antiporter	potassium	ion/metal	E	yes	yes	yes	IE	yes	yes		yes
At4g00630	2.A.37	CPA2	The Monovalent Cation:Proton Antiporter-2 (CPA2) Family		KEA2	proton/potassium antiporter	potassium	ion/metal	E	yes	yes	yes	IE	yes	yes	yes	yes
At2g16800	2.A.52	NiCoT	The Ni2+-Co2+ Transporter (NiCoT) Family			puatative nickel/cobalt transporter	nickel/cobalt	ion/metal	E	yes			IE	yes			yes
At5g19750	9.B.193	Mpv17	The Mpv17/Pmp22 4 TMS Putative Porin (Mpv17) Family			puatative porin	unknown	unknown	E	yes	yes	yes	IE	yes	yes		yes
At2g42770	9.B.192	Mpv17	The Mpv17/Pmp22 4 TMS Putative Porin (Mpv17) Family			puatative porin	unknown	unknown	E		yes	yes	IE	yes			yes
At5g64970	2.A.29	MC	The Mitochondrial Carrier (MC) Family		BT1-like	putative adenine nucleotide carrier	Adenine nucleotide (ATP, ADP)	nucleotide	E		yes		(E)	yes
At3g20240	2.A.29	MC	The Mitochondrial Carrier (MC) Family		BT1-like	putative adenine nucleotide carrier	Adenine nucleotide (ATP, ADP)	nucleotide	E				(E)	yes
At5g02940	1.A.1	VIC	The Voltage-gated Ion Channel (VIC) Superfamily			putative cation channel	cations	ion/metal	E	yes	yes	yes	IE	yes			yes
At5g43745	1.A.2	VIC	The Voltage-gated Ion Channel (VIC) Superfamily			putative cation channel	cations	ion/metal	E	yes	yes	yes	IE	yes	yes		yes
At5g06220	2.A.97	LetM1	The Mitochondrial Inner Membrane K+/H+ and Ca2+/H+ Exchanger (LetM1) Family		LETM1-like	putative cation/proton exchanger	cations	ion/metal	E	yes	yes	yes	IE	yes			yes
At5g16710	1.A.12	CLIC	The Intracellular Chloride Channel (CLIC) Family		DHAR1	putative chloride channel	chloride	ion/metal	E	yes	yes			yes			yes
At1g55930	1.A.112.	CNNM	1.A.112. The Cyclin M Mg2+ Exporter (CNNM) Family			putative CNNM-transporter for cations	divalent cations	ion/metal	E	yes	yes	yes	IE	yes			yes
At3g13070	1.A.112.	CNNM	1.A.112. The Cyclin M Mg2+ Exporter (CNNM) Family			putative CNNM-transporter for cations	divalent cations	ion/metal	E	yes	yes	yes	IE	yes			yes
At2g38550	2.A.126	FAX	The Fatty Acid Exporter (FAX) Family			putative fatty acid exporter	fatty acid	lipid/cell wall components	E	yes	yes	yes	IE	yes	yes	yes	yes
At3g57280	2.A.126	FAX	The Fatty Acid Exporter (FAX) Family		FAX1	putative fatty acid exporter	fatty acid	lipid/cell wall components	E	yes	yes	yes	IE	yes	yes		yes
At5g26820	2.A.100	Fpn	The Ferroportin (Fpn) Family		MAR1	putative iron transporter	iron	ion/metal	E	yes	yes	yes
At4g13590	2.A.106	CaCa2	Ca2+:H+ Antiporter-2 (CaCA2) Family		CMT1	putative manganese ion transporter	manganese	ion/metal	E	yes	yes	yes	IE	yes		yes	yes
At2g35800	2.A.29	MC	The Mitochondrial Carrier (MC) Family			putative S-adenosylhomoserine carrier	S-adenosylhomoserine/biotin/lipoate	other	E	yes	yes	yes	IE	yes		yes	yes
At5g42130	2.A.29	MC	The Mitochondrial Carrier (MC) Family			putative S-adenosylhomoserine carrier	S-adenosylhomoserine/biotin/lipoate	other	E	yes	yes	yes	IE	yes	yes		yes
At2g26360	2.A.29	MC	The Mitochondrial Carrier (MC) Family			putative S-adenosylhomoserine carrier	S-adenosylhomoserine/biotin/lipoate	other	E	yes	yes		IE	yes
At2g21340	2.A.66	MOP	The Multidrug/Oligosaccharidyl-lipid/Polysaccharide (MOP) Flippase Superfamily	MATE		putative salicylate exporter	salicylate	other	E	yes	yes	yes	IE	yes			yes
At4g39030	2.A.66	MOP	The Multidrug/Oligosaccharidyl-lipid/Polysaccharide (MOP) Flippase Superfamily	MATE		putative salicylate exporter	salicylate	other	E	yes	yes	yes	IE	yes
At5g64500	2.A.1	MFS	The Major Facilitator Superfamily (MFS)		spinster-like	putative sphingosine-1-phosphate/sphingolipid transporter	sphingosine-1-phosphate/sphingolipid	other	E				(E)	yes
At2g25520	2.A.7	DMT	The Drug/Metabolite Transporter (DMT) Superfamily			putative sugar phosphate/phosphate translocator	sugar phosphate/phosphate	sugar-(P)	E								yes
At5g52540	2.A.98	PSE	The Putative Sulfate Exporter (PSE) Family			putative transporter	unknown	unknown	E	yes	yes	yes	IE	yes			yes
At3g07430	9.A.4	YggT	The YggT or Fanciful K+ Uptake-B (FkuB; YggT) Family			putative YggT potassium uptake transporter	potassium	ion/metal	E	yes	yes	yes		yes			yes			weak hit
At4g27990	9.A.4	YggT	The YggT or Fanciful K+ Uptake-B (FkuB; YggT) Family			putative YggT potassium uptake transporter	potassium	ion/metal	E	yes	yes	yes		yes	yes	yes	yes			weak hit
At5g21920	9.A.4	YggT	The YggT or Fanciful K+ Uptake-B (FkuB; YggT) Family			putative YggT potassium uptake transporter	potassium	ion/metal	E	yes	yes					yes				weak hit
At1g34065	2.A.29	MC	The Mitochondrial Carrier (MC) Family			S-adenosylhomoserine carrier	S-adenosylhomoserine/biotin/lipoate	other	E	yes			IE	yes
At4g39460	2.A.29	MC	The Mitochondrial Carrier (MC) Family		SAMT/C	S-Adenosylmethionine importer	S-Adenosylmethionine (SAM)	other	E	yes	yes	yes	IE	yes		yes	yes
At3g51895	2.A.53	SulP	The Sulfate Permease (SulP) Family		SULTR3;1	sulfate transporter	sulfate	inorganic anion	E	yes	yes	yes
At2g43240	2.A.7	DMT	The Drug/Metabolite Transporter (DMT) Superfamily		UTR6	UDP-Galactose Transporter	UDP-Galactose	sugar-(P)	E	yes	yes	yes			yes		yes
At5g17630	2.A.7	DMT	The Drug/Metabolite Transporter (DMT) Superfamily		XPT	XPT Xylulose-5-P/phosphate antiporter	Xylulose-5-P	sugar-(P)	E	yes	yes	yes	IE	yes			yes
At5g64280	2.A.47	DASS	The Divalent Anion:Na+ Symporter (DASS) Family		DiT2.2	DiT2.2 Dicarboxylate transporter	glutamate/malate	carboxylate	IE	yes	yes	yes	IE	yes			yes
At5g33320	2.A.7	DMT	The Drug/Metabolite Transporter (DMT) Superfamily		PPT1	Phosphoenolpyruvate/phosphate antiporter	Phosphoenolpyruvate/phosphate	carboxylate	IE	yes	yes	yes	IE	yes	yes		yes
At3g01550	2.A.7	DMT	The Drug/Metabolite Transporter (DMT) Superfamily		PPT2	Phosphoenolpyruvate/phosphate antiporter	Phosphoenolpyruvate/phosphate	carboxylate	IE	yes			IE	yes	yes
At4g38380	2.A.66	MOP	The Multidrug/Oligosaccharidyl-lipid/Polysaccharide (MOP) Flippase Superfamily	MATE		putative citrate/salicylate exporter	citrate	carboxylate	IE	yes	yes		IE	yes
At1g78560	2.A.28	BASS	The Bile Acid:Na+ Symporter (BASS) Family		BASS1	pyruvate:sodium symporter	pyruvate	carboxylate	IE	yes	yes	yes	IE	yes			yes
At3g16240	1.A.8	MIP	The Major Intrinsic Protein (MIP) Family			aquaporin	water	other	IE+TM		yes	yes		yes			yes	TM
At3g26520	1.A.8	MIP	The Major Intrinsic Protein (MIP) Family			aquaporin	water	other	IE+TM		yes	yes		yes			yes	TM
At5g01500	2.A.29	MC	The Mitochondrial Carrier (MC) Family		TAAC	ATP/ADP carrier	ATP/ADP	nucleotide	IE+TM	yes	yes	yes	IE	yes			yes	TM	TM
At5g12860	2.A.47	DASS	The Divalent Anion:Na+ Symporter (DASS) Family		DiT1	DiT1 Dicarboxylate transporter	2-oxoglutarate/malate	carboxylate	IE+TM	yes	yes	yes	IE	yes	yes	yes	yes	TM
At5g64290	2.A.47	DASS	The Divalent Anion:Na+ Symporter (DASS) Family		DiT2.1	DiT2.1 Dicarboxylate transporter	glutamate/malate	carboxylate	IE+TM	yes	yes	yes	IE	yes	yes	yes	yes	TM
At1g32080	2.A.122	LrgB/CidB/GGT	The LrgB/CidB Holin-like Glycolate/Glycerate Transporter (LrgB/CidB/GGT) Family		PLGG1	PLGG1 glycolate/glycerate transporter	glycolate/glycerate	carboxylate	IE+TM	yes	yes	yes	IE	yes	yes	yes	yes	TM
At5g36120	9.A.4	YggT	The YggT or Fanciful K+ Uptake-B (FkuB; YggT) Family			putative YggT potassium uptake transporter	potassium	ion/metal	IE+TM	yes	yes					yes		TM		weak hit
At2g26900	2.A.28	BASS	The Bile Acid:Na+ Symporter (BASS) Family		BASS2	pyruvate:sodium symporter	pyruvate	carboxylate	IE+TM	yes	yes	yes	IE	yes			yes	TM
At5g46110	2.A.7	DMT	The Drug/Metabolite Transporter (DMT) Superfamily		TPT	TPT Triose-P/phosphate translocator	triose-P	sugar-(P)	IE+TM	yes	yes	yes	IE	yes	yes		yes	TM
At5g12130	2.A.10	TerC	The Tellurium Ion Resistance (TerC) Family			uncharacterized transporter	unknown	unknown	IE+TM	yes	yes		IE	yes				TM
At4g01010	1.A.1	VIC	The Voltage-gated Ion Channel (VIC) Superfamily			cyclic nucleotide-gated cation channel	cations		TM	yes	yes							TM
At2g39350	3.A.1	ABC	The ATP-binding Cassette (ABC) Superfamily	ABCG(WHITE)		ABCG-transporter	multidrug, jasmonic acid?		TM		yes							TM
At3g08580	2.A.29	MC	The Mitochondrial Carrier (MC) Family			ADP/ATP carrier	ADP/ATP		TM		yes			yes				TM
At5g13490	2.A.29	MC	The Mitochondrial Carrier (MC) Family			ADP/ATP carrier (antiporter)	ADP/ATP		TM		yes			yes				TM
At3g24290	1.A.11	Amt	The Ammonia Transporter Channel (Amt) Family			ammonium channel	ammonium		TM		yes							TM
At4g35440	2.A.49	ClC	The Chloride Carrier/Channel (ClC) Family		CLCe	CLCe chloride channel	chloride		TM	yes	yes							TM	TM
At1g30400	3.A.1	ABC	The ATP-binding Cassette (ABC) Superfamily	ABCC(MRP)		Drug Conjugate Transporter (DCT) Family ABC-transporter	multidrug		TM		yes			yes				TM
At2g23150	2.A.55	Nramp	The Metal Ion (Mn2+-iron) Transporter (Nramp) Family		NRAMP3	iron/cadmium transporter	iron/cadmium		TM		yes							TM
At1g14660	2.A.36	CPA1	The Monovalent Cation:Proton Antiporter-1 (CPA1) Family		NHX8	litium:proton antiporter	litium		TM		yes							TM
At3g28345	3.A.1	ABC	The ATP-binding Cassette (ABC) Superfamily	ABCB(p-gP)		multidrug efflux ABCB-transporter	multidrug		TM		yes							TM
At4g15233	3.A.1	ABC	The ATP-binding Cassette (ABC) Superfamily	ABCG(PDR)		multidrug efflux ABCG-transporter	multidrug		TM		yes							TM
At2g29940	3.A.1	ABC	The ATP-binding Cassette (ABC) Superfamily	ABCG(PDR)		multidrug efflux ABC-transporter	multidrug		TM		yes							TM
At5g21930	3.A.3	P-ATPase	The P-type ATPase (P-ATPase) Superfamily		HMA8/PAA2	PAA2 copper-transporting P-type ATPase	copper		TM	yes	yes							TM	TM
At1g68100	2.A.5	ZIP	The Zinc (Zn2+)-Iron (Fe2+) Permease (ZIP) Family		LAR1	permease	Indole-3-acetic acid-alanine		TM		yes							TM
At1g54350	3.A.1	ABC	The ATP-binding Cassette (ABC) Superfamily	ABCD(FAE) ABC+membrane	ABCD2	P-FAT family homodimeric fatty acyl CoA ABC-transporter	fatty acyl CoA		TM	yes	yes							TM
At4g18160	1.A.1	VIC	The Voltage-gated Ion Channel (VIC) Superfamily		TPK3	potassium channel	potassium		TM										TM
At2g25600	1.A.1	VIC	The Voltage-gated Ion Channel (VIC) Superfamily			potassium channel	potassium		TM		yes							TM
At4g23640	2.A.72	KUP	The K+ Uptake Permease (KUP) Family			potassium permease	potassium		TM		yes			yes				TM
At4g04850	2.A.37	CPA2	The Monovalent Cation:Proton Antiporter-2 (CPA2) Family		KEA3	proton/potassium antiporter	potassium		TM	yes	yes		TM	yes					TM
At1g31410	3.A.1	ABC	The ATP-binding Cassette (ABC) Superfamily	binding protein		ABC-transporter, substrate- binding protein	polyamines	other	E	yes	yes	yes	IE	yes			yes
At5g14100	3.A.1	ABC	The ATP-binding Cassette (ABC) Superfamily	EcfA		ECF-transporter, EcfA component	biotin/riboflavine	other	E	yes	yes	yes	IE	yes		yes	yes
At5g09930	3.A.1	ABC	The ATP-binding Cassette (ABC) Superfamily	ABCF ABC						yes
At3g25620	3.A.1	ABC	The ATP-binding Cassette (ABC) Superfamily	ABCG(WHITE)						yes
At5g52860	3.A.1	ABC	The ATP-binding Cassette (ABC) Superfamily	ABCG(WHITE)						yes
At5g19410	3.A.1	ABC	The ATP-binding Cassette (ABC) Superfamily	ABCG(WHITE)						yes
At1g59870	3.A.1	ABC	The ATP-binding Cassette (ABC) Superfamily	ABCG(PDR) ABC+membrane						yes	yes			yes
At2g28070	3.A.1	ABC	The ATP-binding Cassette (ABC) Superfamily	ABCG(WHITE)						yes
At1g27770	3.A.3	P-ATPase	The P-type ATPase (P-ATPase) Superfamily							yes
At2g40420	2.A.18	AAAP	2.A.18 The Amino Acid/Auxin Permease (AAAP) Family							yes
At5g04770	2.A.3	APC	The Amino Acid-Polyamine-Organocation (APC) Family							yes
At2g38170	2.A.19	CaCA	The Ca2+:Cation Antiporter (CaCA) Family							yes
At5g01490	2.A.19	CaCA	The Ca2+:Cation Antiporter (CaCA) Family							yes
At1g05580	2.A.37	CPA2	The Monovalent Cation:Proton Antiporter-2 (CPA2) Family
At5g19380	2.A.7	DMT	The Drug/Metabolite Transporter (DMT) Superfamily							yes
At5g59040	1.A.56	Ctr	The Copper Transporter (Ctr) Family							yes
At5g66380	2.A.29	MC	The Mitochondrial Carrier (MC) Family							yes	yes
At3g25410	2.A.28	BASS	The Bile Acid:Na+ Symporter (BASS) Family							yes
At4g12030	2.A.28	BASS	The Bile Acid:Na+ Symporter (BASS) Family							yes
At4g22840	2.A.28	BASS	The Bile Acid:Na+ Symporter (BASS) Family							yes
At1g61800	2.A.7	DMT	The Drug/Metabolite Transporter (DMT) Superfamily							yes
At2g47490	2.A.29	MC	The Mitochondrial Carrier (MC) Family								yes
At4g35080	2.A.52	NiCoT	The Ni2+-Co2+ Transporter (NiCoT) Family							yes
At1g68570	2.A.17	POT	The Proton-dependent Oligopeptide Transporter (POT) Family
At2g27810	2.A.40	NCS2	The Nucleobase:Cation Symporter-2 (NCS2) Family							yes
At5g14040	2.A.29	MC	The Mitochondrial Carrier (MC) Family							yes	yes			yes
At3g48850	2.A.29	MC	The Mitochondrial Carrier (MC) Family							yes
At5g20380	2.A.1	MFS	The Major Facilitator Superfamily (MFS)							yes	yes
At5g05630	2.A.3	APC	The Amino Acid-Polyamine-Organocation (APC) Family							yes
At4g01840	1.A.1	VIC	The Voltage-gated Ion Channel (VIC) Superfamily							yes
At4g32650	1.A.1	VIC	The Voltage-gated Ion Channel (VIC) Superfamily							yes
At5g55630	1.A.1	VIC	The Voltage-gated Ion Channel (VIC) Superfamily							yes
At3g10290	2.A.7	DMT	The Drug/Metabolite Transporter (DMT) Superfamily							yes
At3g02690	2.A.7	DMT	The Drug/Metabolite Transporter (DMT) Superfamily							yes	yes
At3g55040	1.A.12	CLIC	The Intracellular Chloride Channel (CLIC) Family							yes	yes
At1g04570	2.A.71	FBT	The Folate-Biopterin Transporter (FBT) Family							yes
At2g38330	2.A.66	MOP	The Multidrug/Oligosaccharidyl-lipid/Polysaccharide (MOP) Flippase Superfamily	MATE						yes	yes
At1g25500	2.A.92	CTL	The Choline Transporter Like (CTL) Family							yes
At1g43310	2.A.7	DMT	The Drug/Metabolite Transporter (DMT) Superfamily							yes
At3g17700	1.A.1	VIC	The Voltage-gated Ion Channel (VIC) Superfamily							yes
At3g19490	2.A.62	NhaD	The NhaD Na+:H+ Antiporter (NhaD) Family							yes	yes
At5g13550	2.A.53	SulP	The Sulfate Permease (SulP) Family							yes	yes
At4g08620	2.A.53	SulP	The Sulfate Permease (SulP) Family							yes
At1g19570	1.A.12	CLIC	The Intracellular Chloride Channel (CLIC) Family								yes			yes
At2g41560	3.A.3	P-ATPase	The P-type ATPase (P-ATPase) Superfamily								yes			yes
At3g21180	3.A.3	P-ATPase	The P-type ATPase (P-ATPase) Superfamily								yes			yes
At4g17340	1.A.8	MIP	The Major Intrinsic Protein (MIP) Family								yes			yes
At5g19760	2.A.29	MC	The Mitochondrial Carrier (MC) Family								yes			yes
At5g46800	2.A.29	MC	The Mitochondrial Carrier (MC) Family								yes			yes
At3g57330	3.A.3	P-ATPase	The P-type ATPase (P-ATPase) Superfamily							yes				yes
At1g15210	3.A.1	ABC	The ATP-binding Cassette (ABC) Superfamily	ABCG(PDR)						yes	yes
At1g26090	3.A.4	ArsAB	The Arsenite-Antimonite (ArsAB) Efflux Family							yes	yes
At5g12080	1.A.23	MscS	The Small Conductance Mechanosensitive Ion Channel (MscS) Family							yes	yes
At5g44316	3.A.1	ABC	The ATP-binding Cassette (ABC) Superfamily	membrane(SufB/SufD)						yes	yes
At5g53010	3.A.3	P-ATPase	The P-type ATPase (P-ATPase) Superfamily							yes	yes
At5g64840	3.A.1	ABC	The ATP-binding Cassette (ABC) Superfamily	ABC						yes	yes
At1g03270	9.A.40	HCC	The HlyC/CorC (HCC) Family								yes
At1g08890	2.A.1	MFS	The Major Facilitator Superfamily (MFS)								yes
At1g15170	2.A.66	MOP	The Multidrug/Oligosaccharidyl-lipid/Polysaccharide (MOP) Flippase Superfamily	MATE							yes
At1g17260	3.A.3	P-ATPase	The P-type ATPase (P-ATPase) Superfamily								yes
At1g19550	1.A.12	CLIC	The Intracellular Chloride Channel (CLIC) Family								yes
At1g26130	3.A.3	P-ATPase	The P-type ATPase (P-ATPase) Superfamily								yes
At1g28010	3.A.1	ABC	The ATP-binding Cassette (ABC) Superfamily	ABCB(p-gP)							yes
At1g30410	3.A.1	ABC	The ATP-binding Cassette (ABC) Superfamily	ABCC(MRP)							yes
At1g34470	9.A.35	NIPA	The NIPA Mg2+ Uptake Permease (NIPA) Family								yes
At1g48900	3.A.5	IISP	The Type II (General) Secretory Pathway (IISP) Family								yes
At1g51460	3.A.1	ABC	The ATP-binding Cassette (ABC) Superfamily	ABCG(WHITE)							yes
At1g51500	3.A.1	ABC	The ATP-binding Cassette (ABC) Superfamily	ABCG(WHITE)							yes
At1g53470	1.A.23	MscS	The Small Conductance Mechanosensitive Ion Channel (MscS) Family								yes
At1g60160	2.A.72	KUP	The K+ Uptake Permease (KUP) Family								yes
At1g61790	9.A.45	MagT1	The Magnesium Transporter1 (MagT1) Family								yes
At2g01980	2.A.36	CPA1	The Monovalent Cation:Proton Antiporter-1 (CPA1) Family								yes
At2g03520	2.A.7	DMT	The Drug/Metabolite Transporter (DMT) Superfamily	NBUT							yes
At2g24710	1.A.10	GIC	The Glutamate-gated Ion Channel (GIC) Family of Neurotransmitter Receptors								yes
At2g31910	2.A.37	CPA2	The Monovalent Cation:Proton Antiporter-2 (CPA2) Family								yes
At2g34660	3.A.1	ABC	The ATP-binding Cassette (ABC) Superfamily	ABCC(MRP)							yes
At2g47000	3.A.1	ABC	The ATP-binding Cassette (ABC) Superfamily	ABCB(p-gP)							yes
At2g48020	2.A.1	MFS	The Major Facilitator Superfamily (MFS)								yes
At3g20660	2.A.1	MFS	The Major Facilitator Superfamily (MFS)								yes
At3g22910	3.A.3	P-ATPase	The P-type ATPase (P-ATPase) Superfamily								yes
At3g45060	2.A.1	MFS	The Major Facilitator Superfamily (MFS)								yes
At3g49310	2.A.1	MFS	The Major Facilitator Superfamily (MFS)								yes
At3g54110	2.A.29	MC	The Mitochondrial Carrier (MC) Family								yes
At4g17970	2.A.85	ArAE	The Aromatic Acid Exporter (ArAE) Family								yes
At4g28390	2.A.29	MC	The Mitochondrial Carrier (MC) Family								yes
At5g02180	2.A.18	AAAP	The Amino Acid/Auxin Permease (AAAP) Family								yes
At5g37060	2.A.37	CPA2	The Monovalent Cation:Proton Antiporter-2 (CPA2) Family								yes
At5g55200	3.A.8	MPT	The Mitochondrial Protein Translocase (MPT) Family								yes
At5g61520	2.A.1	MFS	The Major Facilitator Superfamily (MFS)								yes
At5g65020	1.A.31	Annexin	The Annexin (Annexin) Family								yes
At1g05940	2.A.3	APC	The Amino Acid-Polyamine-Organocation (APC) Family							yes
At1g09960	2.A.2	GPH	The Glycoside-Pentoside-Hexuronide (GPH):Cation Symporter Family							yes
At1g15520	3.A.1	ABC	The ATP-binding Cassette (ABC) Superfamily	ABCG(PDR)						yes
At1g16010	1.A.35	MIT	The CorA Metal Ion Transporter (MIT) Family							yes
At1g19770	2.A.7	DMT	The Drug/Metabolite Transporter (DMT) Superfamily	POP						yes
At1g47670	2.A.18	AAAP	The Amino Acid/Auxin Permease (AAAP) Family							yes
At1g55620	2.A.49	ClC	The Chloride Carrier/Channel (ClC) Family							yes
At1g64220	3.A.8	MPT	The Mitochondrial Protein Translocase (MPT) Family							yes
At1g66950	3.A.1	ABC	The ATP-binding Cassette (ABC) Superfamily	ABCG(PDR)						yes
At1g76490	2.A.6	RND	The Resistance-Nodulation-Cell Division (RND) Superfamily							yes
At1g80830	2.A.55	Nramp	The Metal Ion (Mn2+-iron) Transporter (Nramp) Family							yes
At1g80900	1.A.35	MIT	The CorA Metal Ion Transporter (MIT) Family							yes
At2g13100	2.A.1	MFS	The Major Facilitator Superfamily (MFS)							yes
At2g16835	1.A.8	MIP	The Major Intrinsic Protein (MIP) Family							yes
At2g26650	1.A.1	VIC	The Voltage-gated Ion Channel (VIC) Superfamily							yes
At3g03700	2.A.92	CTL	The Choline Transporter Like (CTL) Family							yes
At3g04440	2.A.92	CTL	The Choline Transporter Like (CTL) Family							yes
At3g10960	2.A.40	NCS2	The Nucleobase:Cation Symporter-2 (NCS2) Family							yes
At3g16340	3.A.1	ABC	The ATP-binding Cassette (ABC) Superfamily	ABCG(PDR)						yes
At3g17690	1.A.1	VIC	The Voltage-gated Ion Channel (VIC) Superfamily							yes
At3g20920	1.A.15	NSCC2	The Non-selective Cation Channel-2 (NSCC2) Family							yes
At3g51860	2.A.19	CaCA	The Ca2+:Cation Antiporter (CaCA) Family							yes
At3g55640	2.A.29	MC	The Mitochondrial Carrier (MC) Family							yes
At3g58970	1.A.35	MIT	The CorA Metal Ion Transporter (MIT) Family							yes
At4g04750	2.A.1	MFS	The Major Facilitator Superfamily (MFS)							yes
At4g11440	2.A.29	MC	The Mitochondrial Carrier (MC) Family							yes
At4g21900	2.A.66	MOP	The Multidrug/Oligosaccharidyl-lipid/Polysaccharide (MOP) Flippase Superfamily	MATE						yes
At4g27970	2.A.16	TDT	The Telurite-resistance/Dicarboxylate Transporter (TDT) Family							yes
At5g13400	2.A.17	POT	The Proton-dependent Oligopeptide Transporter (POT) Family							yes
At5g14570	2.A.1	MFS	The Major Facilitator Superfamily (MFS)							yes
At5g19500	2.A.42	HAAAP	The Hydroxy/Aromatic Amino Acid Permease (HAAAP) Family							yes
At5g19600	2.A.53	SulP	The Sulfate Permease (SulP) Family							yes
At5g51050	2.A.29	MC	The Mitochondrial Carrier (MC) Family							yes
At5g57940	1.A.1	VIC	The Voltage-gated Ion Channel (VIC) Superfamily							yes

## Sheet: Arabidopsis chloroplast (CE)
Table S2: The table lists transporters and transport systems for ions and metabolites that could be identified in the Arabidopsis thaliana plastidial genome.
The list contains transporters or transport systems predicted in the Arabidopsis plastid genome (version Araport11) with TransAAP (Elbourne et al. 2017), classified according to the Transporter Classification Database (TCDB, Saier et al. 2016). The TCDB-Number, abbreviated and full family name, as well as annotation are provided. The table also lists the putative transporter substrate.
ID	TCDB #	Transporter Family	Transporter Family	Putative substrate	Annotation
ATCG00530	9.B.73	CemA	The Chloroplast Envelope/Cyanobacterial Membrane Protein (CemA) Family	protons	proton extrusion protein pxcA
ATCG01040	9.B.14.	HHP	The Heme Handling Protein (HHP) Family	heme export	Cytochrome c biogenesis protein CcsA or Ccs1

## Sheet: References
Baers LL, Breckels LM, Mills LA, Gatto L, Deery MJ, Stevens TJ, Howe CJ, Lilley KS, Lea-Smith DJ. 2019. Proteome mapping of a cyanobacterium reveals distinct compartment organization and cell-dispersed metabolism. Plant Physiol 181:1721–1738.
Bonfil DJ, Ronen-Tarazi M, Sültemeyer D, Lieman-Hurwitz J, Schatz D, Kaplan A. 1998. A putative HCO3/- transporter in the cyanobacterium Synechococcus sp. strain PCC 7942. FEBS Lett 430:236–240.
Bouchnak I, Brugière S, Moyet L, Le Gall S, Salvi D, Kuntz M, Tardif M, Rolland N. 2019. Unraveling hidden components of the chloroplast envelope proteome: Opportunities and limits of better MS sensitivity. Mol Cell Proteomics 18:1285–1306.
Braakman R, Follows MJ, Chisholm SW. 2017. Metabolic evolution and the self-organization of ecosystems. Proc Natl Acad Sci U S A 114:E3091–E3100.
Bräutigam A, Hoffmann-Benning S, Weber APM. 2008. Comparative proteomics of chloroplast envelopes from C3 and C4 plants reveals specific adaptations of the plastid envelope to C4 photosynthesis and candidate proteins required for maintaining C4 metabolite fluxes. Plant Physiol 148:568–579.
Breuers FKH, Bräutigam A, Weber APM. 2011. The plastid outer envelope - A highly dynamic interface between plastid and cytoplasm. Front Plant Sci 2:97.
Choi JS, Park YH, Oh JH, Kim S, Kwon J, Choi YE. 2019. Efficient profiling of detergent-assisted membrane proteome in cyanobacteria. J Appl Phycol 32:1177–1184.
Eitinger T, Rodionov DA, Grote M, Schneider E. 2011. Canonical and ECF-type ATP-binding cassette importers in prokaryotes: Diversity in modular organization and cellular functions. FEMS Microbiol Rev 35:3–67.
Elbourne LDH, Tetu SG, Hassan KA, Paulsen IT. 2017. TransportDB 2.0: A database for exploring membrane transporters in sequenced genomes from all domains of life. Nucleic Acids Res 45:D320–D324.
Ferro M, Brugière S, Salvi D, Seigneurin-Berny D, Court M, Moyet L, Ramus C, Miras S, Mellal M, Le Gall S, Kieffer-Jaquinod S, Bruley C, Garin J, Joyard J, Masselon C, Rolland N. 2010. AT-CHLORO, a comprehensive chloroplast proteome database with subplastidial localization and curated information on envelope proteins. Mol Cell Proteomics 9:1063–1084.
Finkenwirth F, Kirsch F, Eitinger T. 2013. Solitary bio Y proteins mediate biotin transport into recombinant Escherichia coli. J Bacteriol 195:4105–4111.
Gebhard S, Cook GM. 2008. Differential regulation of high-affinity phosphate transport systems of Mycobacterium smegmatis : Identification of PhnF , a repressor of the phnDCE operon. J Bacteriol 190:1335–1343.
Giménez-Mascarell P, González-Recio I, Fernández-Rodríguez C, Oyenarte I, Müller D, Martínez-Chantar ML, Martínez-Cruz LA. 2019. Current structural knowledge on the CNNM family of magnesium transport mediators. Int J Mol Sci 20:1135.
Gisin J, Müller A, Pfänder Y, Leimkühler S, Narberhaus F, Masepohl B. 2010. A Rhodobacter capsulatus member of a universal permease family imports molybdate and other oxyanions. J Bacteriol 192:5943–5952.
Goetze TA, Patil M, Jeshen I, Bölter B, Grahl S, Soll J. 2015. Oep23 forms an ion channel in the chloroplast outer envelope. BMC Plant Biol 15:47.
Guefrachi I, Pierre O, Timchenko T, Alunni B, Barrière Q, Czernic P, Villaécija-Aguilar JA, Verly C, Bourge M, Fardoux J, Mars M, Kondorosi E, Giraud E, Mergaert P. 2015. Bradyrhizobium BclA is a peptide transporter required for bacterial differentiation in symbiosis with aeschynomene legumes. Mol Plant-Microbe Interact 28:1155–1166.
Hagl PA. 2017. Eisentransport in Chloroplasten - der PIC1-NiCo-YGGT Proteinkomplex. (Dissertation), Fakultät für Biologie, Ludwig-Maximilians-Universität München.
Harsman A, Schock A, Hemmis B, Wahl V, Jeshen I, Bartsch P, Schlereth A, Pertl-Obermeyer H, Goetze TA, Soll J, Philippar K, Wagner R. 2016. OEP40, a regulated glucose-permeable β-barrel solute channel in the chloroplast outer envelope membrane. J Biol Chem 291:17848–17860.
Hooper CM, Tanz SK, Castleden IR, Vacher MA, Small ID, Millar AH. 2014. SUBAcon: A consensus algorithm for unifying the subcellular localization data of the Arabidopsis proteome. Bioinformatics 30:3356–3364.
Huang F, Hedman E, Funk C, Kieselbach T, Schröder WP, Norling B. 2004. Isolation of outer membrane of Synechocystis sp. PCC 6803 and its proteomic characterization. Mol Cell Proteomics 3:586–595.
Huertas MJ, López-Maury L, Giner-Lamia J, Sánchez-Riego AM, Florencio FJ. 2014. Metals in cyanobacteria: Analysis of the copper, nickel, cobalt and arsenic homeostasis mechanisms. Life 4:865–886.
Ito T, Uozumi N, Nakamura T, Takayama S, Matsuda N, Aiba H, Hemmi H, Yoshimura T. 2009. The implication of yggT of Escherichia coli in osmotic regulation. Biosci Biotechnol Biochem 73:2698–2704.
Jack DL, Yang NM, Saier MH. 2001. The drug/metabolite transporter superfamily. Eur J Biochem 268:3620–3639.
Katoh A, Lee K-S, Fukuzawa H, Ohyama K, Ogawa T. 1996a. cemA homologue essential to CO2 transport in the cyanobacterium Synechocystis PCC6803. Proc Natl Acad Sci USA 93:4006–4010.
Katoh A, Sonoda M, Katoh H, Ogawa T. 1996b. Absence of light-induced proton extrusion in a cotA-less mutant of Synechocystis sp. Strain PCC6803. J Bacteriol 178:5452–5455.
Kolaj-Robin O, Russell D, Hayes KA, Pembroke JT, Soulimane T. 2015. Cation diffusion facilitator family: Structure and function. FEBS Lett 589:1283–1295.
Kumar S, Rubino FA, Mendoza AG, Ruiz N. 2019. The bacterial lipid II flippase MurJ functions by an alternating-access mechanism. J Biol Chem 294:981–990.
Liberton M, Saha R, Jacobs JM, Nguyen AY, Gritsenko MA, Smith RD, Koppenaal DW, Pakrasi HB. 2016. Global proteomic analysis reveals an exclusive role of thylakoid membranes in bioenergetics of a model cyanobacterium. Mol Cell Proteomics 15:2021–2032.
Linka N, Esser C. 2012. Transport proteins regulate the flux of metabolites and cofactors across the membrane of plant peroxisomes. Front Plant Sci 3:3.
Mancusso R, Gregorio GG, Liu Q, Wang DN. 2012. Structure and mechanism of a bacterial sodium-dependent dicarboxylate transporter. Nature 491:622–626.
Matsuda N, Kobayashi H, Katoh H, Ogawa T, Futatsugi L, Nakamura T, Bakker EP, Uozumi N. 2004. Na+-dependent K+ uptake Ktr system from the cyanobacterium Synechocystis sp. PCC 6803 and its role in the early phases of cell adaptation to hyperosmotic shock. J Biol Chem 279:54952–54962.
Menéndez N, Braña AF, Salas JA, Méndez C. 2007. Involvement of a chromomycin ABC transporter system in secretion of a deacetylated precursor during chromomycin biosynthesis. Microbiology 153:3061–3070.
Na Rhie M, Yoon HE, Oh HY, Zedler S, Unden G, Kim O Bin. 2014. A Na+-coupled C4-dicarboxylate transporter (Asuc_0304) and aerobic growth of Actinobacillus succinogenes on C4-dicarboxylates. Microbiol (United Kingdom) 160:1533–1544.
Nakamura T, Katoh Y, Shimizu Y, Matsuba Y, Unemoto T. 1996. Cloning and sequencing of novel genes from Vibrio alginolyticus that support the growth of K+ uptake-deficient mutant of Escherichia coli. Biochim Biophys Acta - Bioenerg 1277:201–208.
Nicolaisen K, Hahn A, Schleiff E. 2009. The cell wall in heterocyst formation by Anabaena sp. PCC 7120. J Basic Microbiol 49:5–24.
Nieves-Morión M, Lechno-Yossef S, López-Igual R, Frías JE, Mariscal V, Nürnberg DJ, Mullineaux CW, Wolk CP, Flores E. 2017. Specific glucoside transporters influence septal structure and function in the filamentous, heterocyst-forming cyanobacterium Anabaena sp. strain PCC 7120. J Bacteriol 199:e00876-16.
Pernil R, Picossi S, Mariscal V, Herrero A, Flores E. 2008. ABC-type amino acid uptake transporters Bgt and N-II of Anabaena sp . strain PCC 7120 share an ATPase subunit and are expressed in vegetative cells and heterocysts. Mol Microbiol 67:1067–1080.
Pfeil BE, Schoefs B, Spetea C. 2014. Function and evolution of channels and transporters in photosynthetic membranes. Cell Mol Life Sci 71:979–998.
Pisareva T, Kwon J, Oh J, Kim S, Ge C, Wieslander Å, Choi JS, Norling B. 2011. Model for membrane organization and protein sorting in the cyanobacterium Synechocystis sp. PCC 6803 inferred from proteomics and multivariate sequence analyses. J Proteome Res 10:3617–3631.
Plohnke N, Seidel T, Kahmann U, Rögner M, Schneider D, Rexroth S. 2015. The proteome and lipidome of Synechocystis sp. PCC 6803 cells grown under light-activated heterotrophic conditions. Mol Cell Proteomics 14:572–584.
Pohland AC, Schneider D. 2019. Mg2+ homeostasis and transport in cyanobacteria - at the crossroads of bacterial and chloroplast Mg2+ import. Biol Chem 400:1289–1301.
Pootakham W, Gonzalez-Ballester D, Grossman AR. 2010. Identification and regulation of plasma membrane sulfate transporters in Chlamydomonas. Plant Physiol 153:1653–1668.
Price GD, Woodger FJ, Badger MR, Howitt SM, Tucker L. 2004. Identification of a SulP-type bicarbonate transporter in marine cyanobacteria. Proc Natl Acad Sci U S A 101:18228–18233.
Qiu G-W, Lou W-J, Sun C-Y, Yang N, Li Z-K, Li D-L, Zang S-S, Fu F-X, Hutchins DA, Jiang H-B, Qiu B-S. 2018. Outer membrane iron uptake pathways in the model cyanobacterium Synechocystis sp. strain PCC 6803. Appl Environ Microbiol 84:e01512-18.
Raimunda D, Gonzalez-Guerrero M, Leeber III BW, Argüello JM. 2011. The transport mechanism of bacterial Cu+ -ATPases: distinct efflux rates adapted to different function. Bone 24:467–475.
Rasmussen T. 2016. How do mechanosensitive channels sense membrane tension? Biochem Soc Trans 44:1019–1025.
Reyes-Prieto A, Yoon HS, Moustafa A, Yang EC, Andersen RA, Boo SM, Nakayama T, Ishida KI, Bhattacharya D. 2010. Differential gene retention in plastids of common recent origin. Mol Biol Evol 27:1530–1537.
Rodionov DA, Hebbeln P, Eudes A, Ter Beek J, Rodionova IA, Erkens GB, Slotboom DJ, Gelfand MS, Osterman AL, Hanson AD, Eitinger T. 2009. A novel class of modular transporters for vitamins in prokaryotes. J Bacteriol 91:42–51.
Rolland N, Dorne A-J, Amoroso G, Sültemeyer DF, Joyard J, Rochaix J-D. 1997. Disruption of the plastid ycf10 open reading frame affects uptake of inorganic carbon in the chloroplast of Chlamydomonas. EMBO J 16:6713–6726.
Rouanet C, Nasser W. 2001. The PecM protein of the phytopathogenic bacterium Erwinia chrysanthemi, membrane topology and possible involvement in the efflux of the blue pigment indigoidine. J Mol Microbiol Biotechnol 3:309–318.
Saier MH, Reddy VS, Tsu B V., Ahmed MS, Li C, Moreno-Hagelsieb G. 2016. The Transporter Classification Database (TCDB): Recent advances. Nucleic Acids Res 44:D372–D379.
Sasaki Y, Sekiguchi K, Nagano Y, Matsuno R. 1993. Chloroplast envelope protein encoded by chloroplast genome. FEBS Lett 316:93–98.
Seigneurin-Berny D, Gravot A, Auroy P, Mazard C, Kraut A, Finazzi G, Grunwald D, Rappaport F, Vavasseur A, Joyard J, Richaud P, Rolland N. 2006. HMA1, a new Cu-ATPase of the chloroplast envelope, is essential for growth under adverse light conditions. J Biol Chem 281:2882–2892.
Sestok AE, Linkous RO, Smith AT. 2018. Toward a mechanistic understanding of Feo-mediated ferrous iron uptake. Metallomics 10:887–898.
Shibata M, Katoh H, Sonoda M, Ohkawa H, Shimoyama M, Fukuzawa H, Kaplan A, Ogawa T. 2002. Genes essential to sodium-dependent bicarbonate transport in cyanobacteria: Function and phylogenetic analysis. J Biol Chem 277:18658–18664.
Simm S, Papasotiriou DG, Ibrahim M, Leisegang MS, Müller B, Schorge T, Karas M, Mirus O, Sommer MS, Schleiff E. 2013. Defining the core proteome of the chloroplast envelope membranes. Front Plant Sci 4:11.
Sutherland MC, Tran NL, Tillman DE, Jarodsky JM, Yuan J, Kranz RG. 2018. Structure-function analysis of the bifunctional CcsBA heme exporter and cytochrome c synthetase. MBio 9:e02134-18.
Tsunekawa K, Shijuku T, Hayashimoto M, Kojima Y, Onai K, Morishita M, Ishiura M, Kuroda T, Nakamura T, Kobayashi H, Sato M, Toyooka K, Matsuoka K, Omata T, Uozumi N. 2009. Identification and characterization of the Na+/H+ antiporter NhaS3 from the thylakoid membrane of Synechocystis sp. PCC 6803. J Biol Chem 284:16513–16521.
Valadez-Cano C, Olivares-Hernández R, Resendis-Antonio O, DeLuna A, Delaye L. 2017. Natural selection drove metabolic specialization of the chromatophore in Paulinella chromatophora. BMC Evol Biol 17:99.
Waditee R, Hossain GS, Tanaka Y, Nakamura T, Shikata M, Takano J, Takabe T, Takabe T. 2004. Isolation and functional characterization of Ca2+/H+ antiporters from cyanobacteria. J Biol Chem 279:4330–4338.
Wang Z, Anderson NS, Benning C. 2013. The phosphatidic acid binding site of the arabidopsis trigalactosyldiacylglycerol 4 (TGD4) protein required for lipid import into chloroplasts. J Biol Chem 288:4763–4771.
Weber A, Flügge UI. 2002. Interaction of cytosolic and plastidic nitrogen metabolism in plants. J Exp Bot 53:865–874.
Wylie JL, Worobec EA. 1995. The OprB porin plays a central role in carbohydrate uptake in Pseudomonas aeruginosa. J Bacteriol 177:3021–3026.
Zakataeva NP, Kutukova EA, Gronskiy S V., Troshin P V., Livshits VA, Aleshin V V. 2006. Export of metabolites by the proteins of the DMT and RhtB families and its possible role in intercellular communication. Microbiology 75:438–448.
Zulkifli L, Akai M, Yoshikawa A, Shimojima M, Ohta H, Guy HR, Uozumi N. 2010. The KtrA and KtrE subunits are required for Na+-dependent K + uptake by KtrB across the plasma membrane in Synechocystis sp. strain PCC 6803. J Bacteriol 192:5063–5070.
