# Supplementary material for: The Puzzle of Metabolite Exchange and Identification of Putative Octotrico Peptide Repeat Expression Regulators in the Nascent Photosynthetic Organelles of Paulinella chromatophora
Source: Front Microbiol. 2020 Nov 27;11:607182. doi: 10.3389/fmicb.2020.607182 (PMC7729196; doi:10.3389/fmicb.2020.607182)
Supplement: Supplementary file 5 [file Table_4.xlsx]

## Sheet: Sheet1
Table S4: Single-helix MEMSAT-SVM pore-lining predictions with predicted stoichiometry, and AmpGram AMP prediction for Group 1 orphan import candidates. Entries in bold represent MS-identified import candidates, entries in regular font represent similar proteins identified in P. chromatophora transcriptome data.
Name	Name	Pore-lining Score[a]	Stoichiometry[b]	AMP pattern probability[c]
scaffold22570-size620|m.118457	scaffold22570-m.118457	0.833	3	0.364
scaffold18064-size774|m.104324	scaffold18064-m.104324	0.771	3	0.788
scaffold19203-size731|m.108122	scaffold19203-m.108122	0.741	4	0.652
scaffold22658-size618|m.118727	scaffold22658-m.118727	0.668	3	0.070
scaffold16791-size829|m.99896	scaffold16791-m.99896	0.661	3	0.059
scaffold52394-size246|m.185473	scaffold52394-m.185473	0.627	3	0.657
scaffold20187-size694|m.111259	scaffold20187-m.111259	0.611	3	0.172
scaffold27898-size495|m.133262	scaffold27898-m.133262	0.61	3	0.196
scaffold28627-size481|m.135056	scaffold28627-m.135056	0.61	3	0.652
scaffold35590-size378|m.151586	scaffold35590-m.151586	0.56	4	0.540
scaffold16238-size857|m.97925	scaffold16238-m.97925	0.538	4	0.495
scaffold30821-size444|m.140533	scaffold30821-m.140533	0.525	4	0.546
scaffold25032-size555|m.125510	scaffold25032-m.125510	0.516	3	0.330
scaffold26247-size528|m.128866	scaffold26247-m.128866	0.507	3	0.103
scaffold29101-size472|m.136255	scaffold29101-m.136255	0.507	3	0.103
scaffold17508-size798|m.102386	scaffold17508-m.102386	0.507	3	0.127
scaffold52582-size245|m.185802	scaffold52582-m.185802	0.5	3	0.112
scaffold21859-size642|m.116371	scaffold21859-m.116371	0.497	3	0.207
scaffold19852-size706|m.110196	scaffold19852-m.110196	0.481	4	0.251
scaffold50116-size259|m.181040	scaffold50116-m.181040	0.446	4	0.375
scaffold33572-size403|m.147014	scaffold33572-m.147014	0.446	4	0.388
scaffold12228-size1099|m.82351	scaffold12228-m.82351	0.44	3	0.165
scaffold31918-size427|m.143184	scaffold31918-m.143184	0.439	3	0.210
scaffold11441-size1160|m.78969	scaffold11441-m.78969	0.436	4	0.721
scaffold21270-size659|m.114594	scaffold21270-m.114594	0.424	4	0.319
scaffold44176-size299|m.169563	scaffold44176-m.169563	0.424	4	0.319
scaffold27338-size506|m.131785	scaffold27338-m.131785	0.405	3	0.467
scaffold21554-size651|m.115432	scaffold21554-m.115432	0.398	4	0.427
scaffold20970-size668|m.113655	scaffold20970-m.113655	0.377	3	0.271
scaffold17649-size791|m.102892	scaffold17649-m.102892	0.374	3	0.281
scaffold28437-size484|m.134580	scaffold28437-m.134580	0.367	3	0.221
scaffold14591-size945|m.91815	scaffold14591-m.91815	0.361	3	0.222
scaffold29584-size464|m.137513	scaffold29584-m.137513	0.333	3	0.431
scaffold38561-size347|m.158043	scaffold38561-m.158043	0.329	3	0.187
scaffold37177-size361|m.154986	scaffold37177-m.154986	0.305	3	0.874
scaffold19030-size736|m.107575	scaffold19030-m.107575	0.299	3	0.346
scaffold34225-size395|m.148553	scaffold34225-m.148553	0.293	4	0.393
scaffold14182-size969|m.90232	scaffold14182-m.90232	0.289	3	0.318
scaffold10537-size1234|m.74914	scaffold10537-m.74914	0.281	4	0.064
scaffold29281-size469|m.136705	scaffold29281-m.136705	0.256	-	0.270
scaffold51627-size251|m.184009	scaffold51627-m.184009	0.255	-	0.291
scaffold47746-size274|m.176463	scaffold47746-m.176463	0.255	-	0.413
scaffold26107-size531|m.128484	scaffold26107-m.128484	0.228	-	0.737
scaffold33246-size408|m.146268	scaffold33246-m.146268	0.222	-	0.871
scaffold34704-size389|m.149622	scaffold34704-m.149622	0.215	-	0.661
scaffold49054-size266|m.178992	scaffold49054-m.178992	0.21	-	0.775
scaffold18129-size771|m.104557	scaffold18129-m.104557	0.205	-	0.225
scaffold11958-size1119|m.81185	scaffold11958-m.81185	0.2	-	0.089
scaffold38478-size348|m.157842	scaffold38478-m.157842	0.181	-	0.406
scaffold16155-size862|m.97626	scaffold16155-m.97626	0.143	-	0.131
scaffold33120-size409|m.145970	scaffold33120-m.145970	0.137	-	0.260
scaffold12323-size1092|m.82733	scaffold12323-m.82733	0.128	-	0.127
scaffold26682-size519|m.130062	scaffold26682-m.130062	0.122	-	0.755
scaffold41653-size319|m.164469	scaffold41653-m.164469	0.108	-	0.411
scaffold26143-size531|m.128583	scaffold26143-m.128583	0.106	-	0.342
scaffold35692-size377|m.151791	scaffold35692-m.151791	0.075	-	0.132
scaffold17524-size797|m.102436	scaffold17524-m.102436	0.033	-	0.324
scaffold24345-size572|m.123581	scaffold24345-m.123581	0.032	-	0.516
scaffold2825-size2355|m.30676	scaffold2825-m.30676	-0.075	-	0.282
scaffold32507-size419|m.144601	scaffold32507-m.144601	-0.112	-	0.908
scaffold16759-size831|m.99777	scaffold16759-m.99777	-0.344	-	0.721
[a] MEMSAT-SVM scores, where higher values indicate a higher likelihood of having pore-lining residues. As defined by the developer, values above 0.27 are considered indicative of holding a pore-lining region.
[b] Stoichiometries are only reported for helices that are predicted to have pore-lining regions.
[c] Probabilities of having an AMP pattern, as reported by AmpGram, with values above 0.5 indicating a potential AMP region in the sequence.
